1 **Brain transcriptional regulatory architecture and schizophrenia etiology**  
2 **converge between East Asian and European ancestral populations**

3 Sihan Liu<sup>1</sup>, Yu Chen<sup>1</sup>, Feiran Wang<sup>1</sup>, Yi Jiang<sup>1</sup>, Fangyuan Duan<sup>1</sup>, Yan Xia<sup>1,2</sup>, Zhilin Ning<sup>3</sup>,  
4 Miao Li<sup>1</sup>, Wenying Qiu<sup>4</sup>, Chao Ma<sup>4</sup>, Xiao-Xin Yan<sup>5</sup>, Aimin Bao<sup>6</sup>, Jiapei Dai<sup>7</sup>, Richard F.  
5 Kopp<sup>2</sup>, Liz Kuney<sup>2</sup>, Jufang Huang<sup>5</sup>, Shuhua Xu<sup>3</sup>, Beisha Tang<sup>8</sup>, Chunyu Liu<sup>1,2</sup>, Chao  
6 Chen<sup>1,8,9,10\*</sup>

7 <sup>1</sup> Center for Medical Genetics & Hunan Key Laboratory of Medical Genetics, School of Life  
8 Sciences, Central South University, Changsha, Hunan 410078, China

9 <sup>2</sup> Department of Psychiatry, SUNY Upstate Medical University, Syracuse, NY 13210, USA

10 <sup>3</sup> Key Laboratory of Computational Biology, CAS-MPG Partner Institute for Computational  
11 Biology, Shanghai Institute of Nutrition and Health, Shanghai Institutes for Biological  
12 Sciences, University of Chinese Academy of Sciences, Chinese Academy of Sciences,  
13 Shanghai 200031, China

14 <sup>4</sup> Institute of Basic Medical Sciences, Neuroscience Center, National Human Brain Bank  
15 for Development and Function, Chinese Academy of Medical Sciences; Department of  
16 Human Anatomy, Histology and Embryology, School of Basic Medicine, Peking Union  
17 Medical College, Beijing 100005, China

18 <sup>5</sup> Department of Human Anatomy and Neurobiology, Xiangya School of Medicine, Central  
19 South University, Changsha 410000, China

20 <sup>6</sup> Department of Neurobiology, Zhejiang University School of Medicine, Hangzhou 310058,  
21 China

22 <sup>7</sup> Wuhan Institute for Neuroscience and Engineering, South-Central University for  
23 Nationalities, Wuhan 430074, China

24 <sup>8</sup> National Clinical Research Center for Geriatric Disorders, Xiangya Hospital, Central  
25 South University, Changsha 410000, China

26 <sup>9</sup> Hunan Key Laboratory of Animal Models for Human Diseases, Central South University,  
27 Changsha 410000, China

28 <sup>10</sup> Hunan Key Laboratory of Molecular Precisional Medicine, Central South University,  
29 Changsha 410078, China

30 These authors contributed equally: Sihan Liu, Yu Chen, Feiran Wang.

31 \*Corresponding author: email [chenchao@sklmg.edu.cn](mailto:chenchao@sklmg.edu.cn)

## 32 **Abstract**

33 Understanding the genetic architecture of gene expression and splicing in human brain  
34 is critical to unlocking the mechanisms of complex neuropsychiatric disorders like  
35 schizophrenia (SCZ). Large-scale brain transcriptomic studies are based primarily on  
36 populations of European (EUR) ancestry. The uniformity of mono-racial resources may  
37 limit important insights into the disease etiology. Here, we characterized brain  
38 transcriptional regulatory architecture of East Asians (EAS; n=151), identifying 3,278  
39 expression quantitative trait loci (eQTL) and 4,726 spliceQTL (sQTL). Comparing these  
40 to PsychENCODE/BrainGVEX confirmed our hypothesis that the transcriptional  
41 regulatory architecture in EAS and EUR brains align. Furthermore, distinctive allelic  
42 frequency and linkage disequilibrium impede QTL translation and gene-expression  
43 prediction accuracy. Integration of eQTL/sQTL with genome-wide association studies  
44 reveals common and novel SCZ risk genes. Pathway-based analyses showing shared  
45 SCZ biology point to synaptic and GTPase dysfunction as a prospective pathogenesis.  
46 This study elucidates the transcriptional landscape of the EAS brain and emphasizes  
47 an essential convergence between EAS and EUR populations.

## 48 **Main**

49 Population genetics examines differences within and between populations and how  
50 such genetic differences contribute to health and disease. A global understanding of  
51 the influence of genetic variance on complex diseases would advance insight into the  
52 biological mechanisms of disease risk<sup>1</sup>. During the past decade, genome-wide  
53 association studies (GWAS) have identified thousands of risk variants for psychiatric  
54 disorders across diverse populations<sup>2,3</sup>. Nonetheless, most of samples in psychiatric  
55 disorders GWAS originate from those of European (EUR) descent<sup>4</sup>. Due to ancestral  
56 differences evident in allele frequencies (AF), linkage disequilibrium (LD) patterns, and  
57 other factors, GWAS findings often fail to translate to other populations<sup>5,6</sup>. For example,  
58 Martin et al. examined that genetic risk prediction accuracy will decrease within  
59 heterogeneous populations which the original GWAS sample and target of prediction  
60 are divergent<sup>5</sup>.

61 Interpreting GWAS “hits” with expression quantitative trait loci (eQTL) and splicing  
62 quantitative trait loci (sQTL), significantly enriched for trait-associated SNPs offers a  
63 feasible alternative for advancing our understanding of the molecular mechanisms  
64 underlying complex traits<sup>7,8</sup>. In the past decade, eQTL and sQTL have become familiar  
65 and effective tools enabling GWAS to explain single nucleotide polymorphism (SNP)  
66 heritability and spotlighting potential disease risk genes<sup>9-14</sup>. Various methods have  
67 been proposed to interpret GWAS using eQTL/sQTL signals to establish gene-  
68 expression prediction models. Examples such as PrediXcan<sup>15</sup> and TWAS<sup>16</sup> correlate  
69 imputed gene expression to a phenotype under investigation. However with  
70 eQTL/sQTL, the problem of population disparity becomes even more extreme, as most  
71 resources focus largely on the EUR ancestry alone<sup>17-20</sup>. The capacity of existing  
72 prediction models to isolate causal genes common across populations appears to be  
73 constrained by the Eurocentricity of the models themselves. In this way, the limited  
74 availability of non-EUR GWAS impedes our ability to fully understand the genetic basis

75 of diseases and to translate basic research into clinical medicine.

76 Recent studies have discovered significant inefficiency in predictive performance  
77 between heterogenous populations<sup>14,21-23</sup>. One plausible explanation for this is the  
78 differences in LD patterns and AF distribution. These disparities also hinder the ability  
79 of QTL to replicate in diverse populations. For example, comparing the regulatory  
80 architecture of gene expression in lymphoblastoid cell lines, Stranger *et al.* found that  
81 QTL differentiation among populations was likely due to AF differences reducing the  
82 statistical power of association testing<sup>24</sup>. Additionally, Lauren *et al.* showed that the AF  
83 differences between populations led to the accurate prediction of some genes and poor  
84 prediction in others<sup>22</sup>. Therefore, developing new transcriptome regulatory profiles and  
85 prediction models specific to ancestral populations is critical for accurately predicting  
86 gene expression and identifying disease risk genes.

87 It should be noted that transcriptomic studies conducted for other tissues (e.g., blood),  
88 cannot adequately represent the transcriptome of neuropsychiatric disorders that are  
89 most closely associated with the brain<sup>25</sup>. Gene expression is tissue-specific. Moreover,  
90 many studies have discovered that QTLs within specific pathogenic tissues are  
91 significantly enriched for relevant trait associations<sup>26-30</sup>. For example, in the frontal  
92 cortex, a region widely accepted as critical for schizophrenia (SCZ), QTLs detected  
93 are significantly enriched with greater SCZ GWAS signals than QTLs detected from  
94 other tissues<sup>26-28</sup>. Such findings signal the need to develop regulatory profiling of the  
95 human brain to uncover the biological mechanisms of SCZ. Several studies have  
96 generated large-scale postmortem brain data<sup>31-33</sup>. For instance, Wang *et al.* developed  
97 a comprehensive resource for functional genomics of 1,866 adult brains using  
98 PsychENCODE data that highlights key genes and pathways associated with SCZ,  
99 including immunological, synaptic, and metabolic pathways<sup>33</sup>. To our knowledge, no  
100 systematic investigation into whether the genetic control of gene expression and  
101 splicing in brain is similar or varies between populations exists. Furthermore,

102 determining whether differences represent etiologic heterogeneity in SCZ across  
103 populations also begs investigation.

104 Here, we developed a novel brain transcriptome dataset comprised of 151 EAS  
105 individuals. We hypothesize that the brain's regulatory architecture of gene expression  
106 and the etiology of SCZ converge between EAS and EUR populations. We also posit  
107 that AF and LD patterns distinct to ancestral populations are at least in part responsible  
108 for QTL heterogeneity across populations. To test these hypotheses, we applied eQTL,  
109 sQTL and co-expression analyses, comparing the results with existing  
110 PsychENCODE/BrainGVEX data (specifically the EUR subpopulation) to evaluate the  
111 similarities and differences in the transcriptional regulatory architecture of the two  
112 populations. By integrating eQTL and sQTL results with SCZ GWAS summary data,  
113 we quantified the enrichment of eQTL/sQTL associated with GWAS signals. Further,  
114 we identified common and novel risk genes as well as disease-related pathways. From  
115 these data we assembled a new genome-wide human brain regulatory map, which  
116 affords considerable insight into the biological progression of SCZ in East Asians.

## 117 **Results**

118 To identify EAS-specific regulatory variants shaping brain gene expression and  
119 alternative splicing, we performed high-density genotyping and high-throughput RNA-  
120 sequencing in 151 EAS prefrontal cortices (Fig. 1). After quality control and  
121 preprocessing (Methods and Extended Data Fig. 1), we gathered 18,939 brain-  
122 expressed genes and 6.4 million autosomal SNPs. PCA (principal component analysis)  
123 of ancestry verified the East Asian ethnicity of all donors (Supplementary Note). eQTL  
124 and sQTL mapping and constructed co-regulatory networks enabled us to examine the  
125 brain expression regulatory architecture of each population individually, with the EUR  
126 population derived from the PsychENCODE/BrainGVEX project.

### 127 **Identifying and characterizing the function of cis-acting expression QTLs and** 128 **splicing QTLs revealed common enrichment patterns between populations**

129 We identified cis-eQTLs using QTLtools<sup>34</sup>(Fig. 1), adjusting for 20 hidden covariates  
130 identified by the probabilistic estimation of expression residuals (PEER)<sup>35</sup> (Methods  
131 and Supplementary Note). These hidden factors were significantly correlated with  
132 technical and biological covariates such as experimental batch, RNA Integrity Number  
133 (RIN), sex, and age of death. We identified 3,278 genes with a cis-eQTL (false  
134 discovery rate (FDR) q-value < 0.05) in EAS populations, 10,043 genes with a cis-  
135 eQTL (FDR q-value < 0.05) in EUR populations, which are referred to as eGenes  
136 (Table 1).

137 By identifying numerous excised intronic clusters using LeafCutter<sup>36</sup> (Methods and Fig.  
138 1), we were able to discover sQTLs as well. We identified 4,726 significant sQTLs  
139 (FDR q-value < 0.05) in EAS and 18,927 significant sQTLs (FDR q-value < 0.05) in  
140 EUR populations, which were mapped to 2,054 and 5,641 genes (sGenes)  
141 respectively per population (Table 1).

142 To better characterize the function of the eQTLs and sQTLs, we evaluated their

143 distance distribution and enrichment in numerous functional regions. Our first finding  
144 agreed with previous results conducted in EUR brains<sup>33,37,38</sup>: 20% of the eQTLs in both  
145 populations were located within 10kb of the transcription start site (TSS) regions (Fig.  
146 2a,b); the most significant ( $FDR_{\text{permutation}} \text{ q-value} < 0.05$ ) SNP per sQTL (sSNP) showed  
147 clustering around the splice junction. Fifty percent of sQTLs are located within 10 kb  
148 of the splice junction (Fig. 3a,b) in both EAS and EUR populations, demonstrating that  
149 variants proximal to splicing junctions have a large effect. In contrast to eQTL, the  
150 majority of sSNPs (60%) lie within the gene body (Fig. 3c), also consistent with  
151 previous research<sup>38</sup>.

152 We then annotated expressed SNPs (eSNPs) and sSNPs with chromatin state  
153 predictions for prefrontal cortical tissue using GREGOR<sup>39</sup> (Methods). We found that  
154 eSNPs and sSNPs were significantly enriched in the same TSSs, promoters, and  
155 transcribed regulatory promoters or enhancers ( $P_{\text{Bonferroni}} < 0.05$ , Fig. 2c, Fig. 3d;  
156 Supplementary Table 4). We also annotated eSNPs with transcription factor binding  
157 sites (TFBS) and sSNPs with experimentally determined RNA binding protein (RBP)  
158 binding sites. We observed that 46 and 49 TFBS were significantly enriched with  
159 eQTLs in the EAS and EUR populations separately ( $P_{\text{Bonferroni}} < 0.05$ , Fig. 2d,e and  
160 Supplementary Table 4). All of TFBS that were significantly enriched with eQTLs in  
161 EAS population were also significantly enriched with eQTLs in EUR population.  
162 Furthermore, sQTLs were significantly enriched in binding targets of 7 RBPs in the  
163 EAS population, while binding targets of 71 RBPs were significant in the EUR sQTL  
164 dataset ( $P_{\text{Bonferroni}} < 0.05$ , Fig. 3e,f and Supplementary Table 4). Five of the seven RBPs  
165 that were significantly enriched with sQTLs in the EAS population were also  
166 significantly enriched with sQTLs in EUR populations.

167

168

Table 1: Identification of eQTLs and sQTLs

|                          | #SNPs     | #Genes | #Intron clusters | #cis-eQTLs/sQTLs    | #Significant eGenes/sGenes |
|--------------------------|-----------|--------|------------------|---------------------|----------------------------|
| <b>EAS(n=145)</b>        | 6,045,349 | 18,939 | 146,884          | 604,485/994,668     | 3,278/2,054                |
| <b>EUR(n=397)</b>        | 8,108,028 | 16,542 | 188,310          | 2,790,193/4,705,755 | 10,043/5,641               |
| <b>Across population</b> | 4,681,303 | 16,266 | 132,619          | 286,288/442,281     | 2,650/1,779                |

169 Cis-eQTLs/sQTLs are defined as FDR q-value < 0.05. Significant cis-eQTLs/sQTLs  
170 across populations defined as eQTLs/sQTLs significant in EAS and EUR populations  
171 in the same direction. Significant eGenes are genes regulated by SNPs that passed  
172 multiple testing (FDR q-value < 0.05) based on the permutation-based analysis.  
173 Significant sGenes are genes that intron clusters can map to and passed multiple  
174 testing (FDR q-value < 0.05) based on the permutation-based analysis.



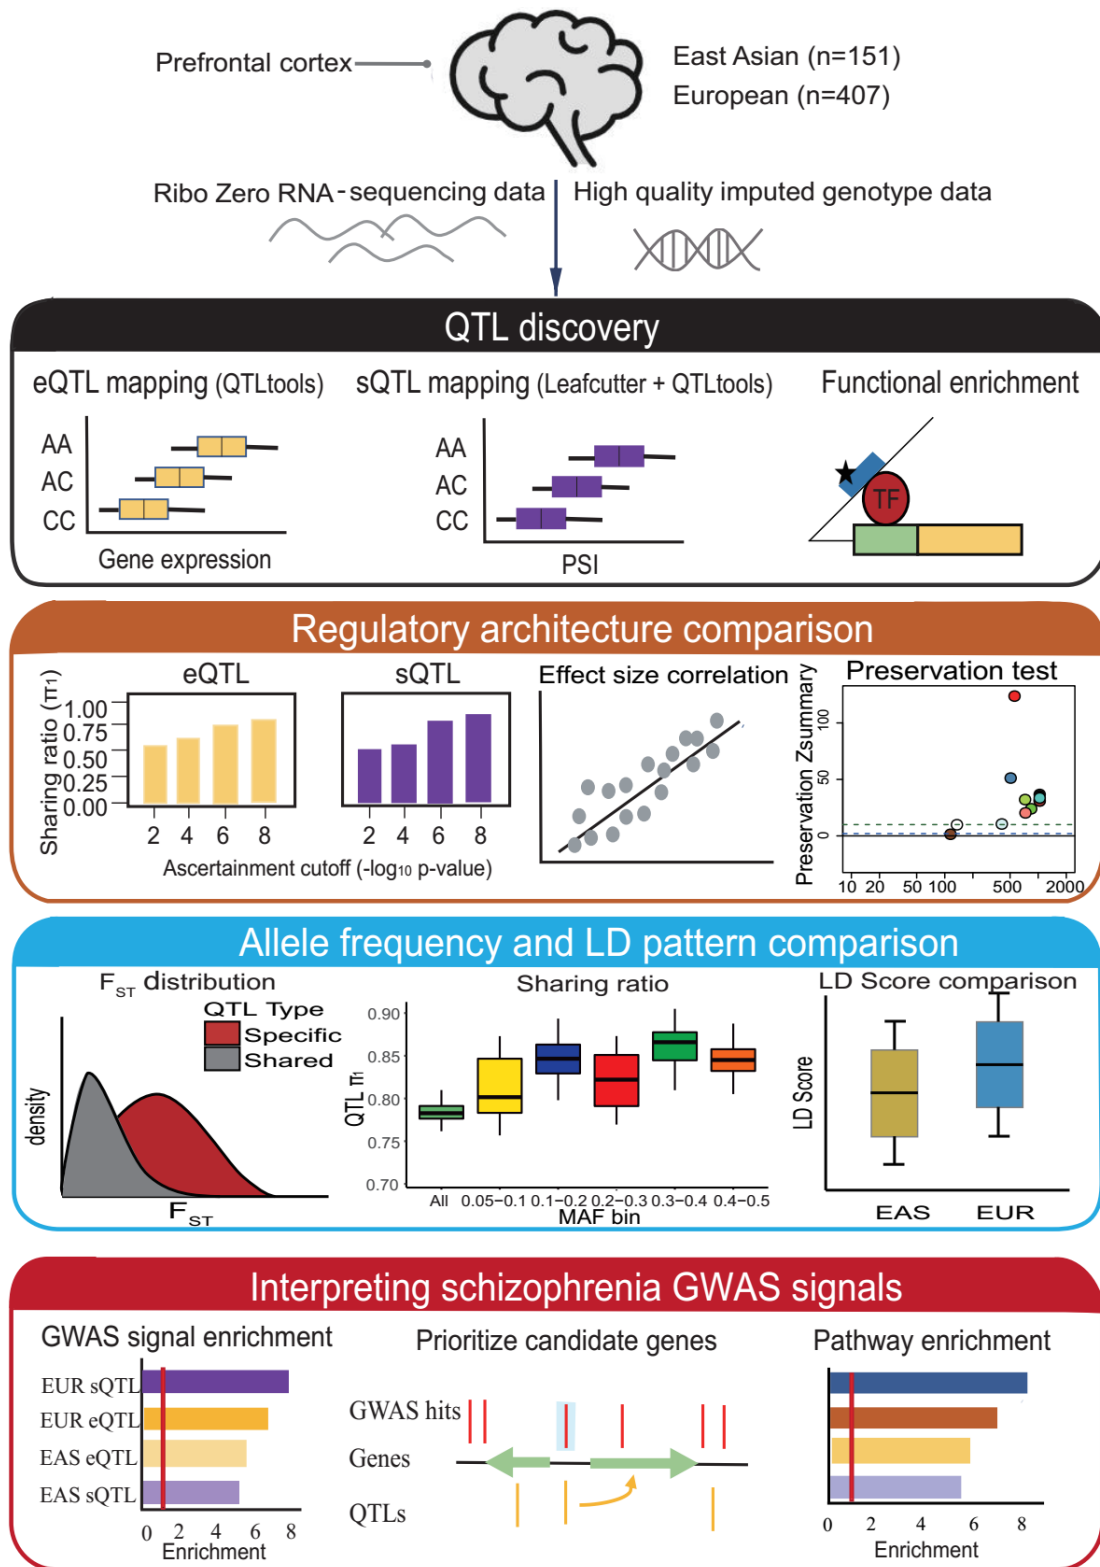

175

176 **Fig. 1 | Study design.** We collected genotype and RNA-seq data from East Asian (n  
 177 = 151) and European populations (n = 407). After quality control and data  
 178 preprocessing, eQTL and sQTL were independently calculated using standard

179 methods of covariate correction. QTLs were characterized based on functional  
180 enrichment. Then, we compared the regulatory architecture including eQTL/sQTL and  
181 the gene co-regulatory patterns between EAS and EUR populations. Next, we  
182 calculated  $F_{ST}$  and LD scores to evaluate the contribution of AF and LD patterns  
183 difference in QTL comparison. Finally, to determine whether schizophrenia biology  
184 between East Asian and European populations is analogous, we integrated QTLs  
185 previous identified with SCZ GWAS to identify disease risk and important biological  
186 processes under genetic control. PSI: percent-spliced-in;  $F_{ST}$ : Fixation index,  
187 measures the population differentiation due to genetic structure; LD: linkage  
188 disequilibrium; LD score: the sum of the LD  $r^2$  between the focal SNP and all the  
189 flanking SNPs within a 1cM window with 1000G data.

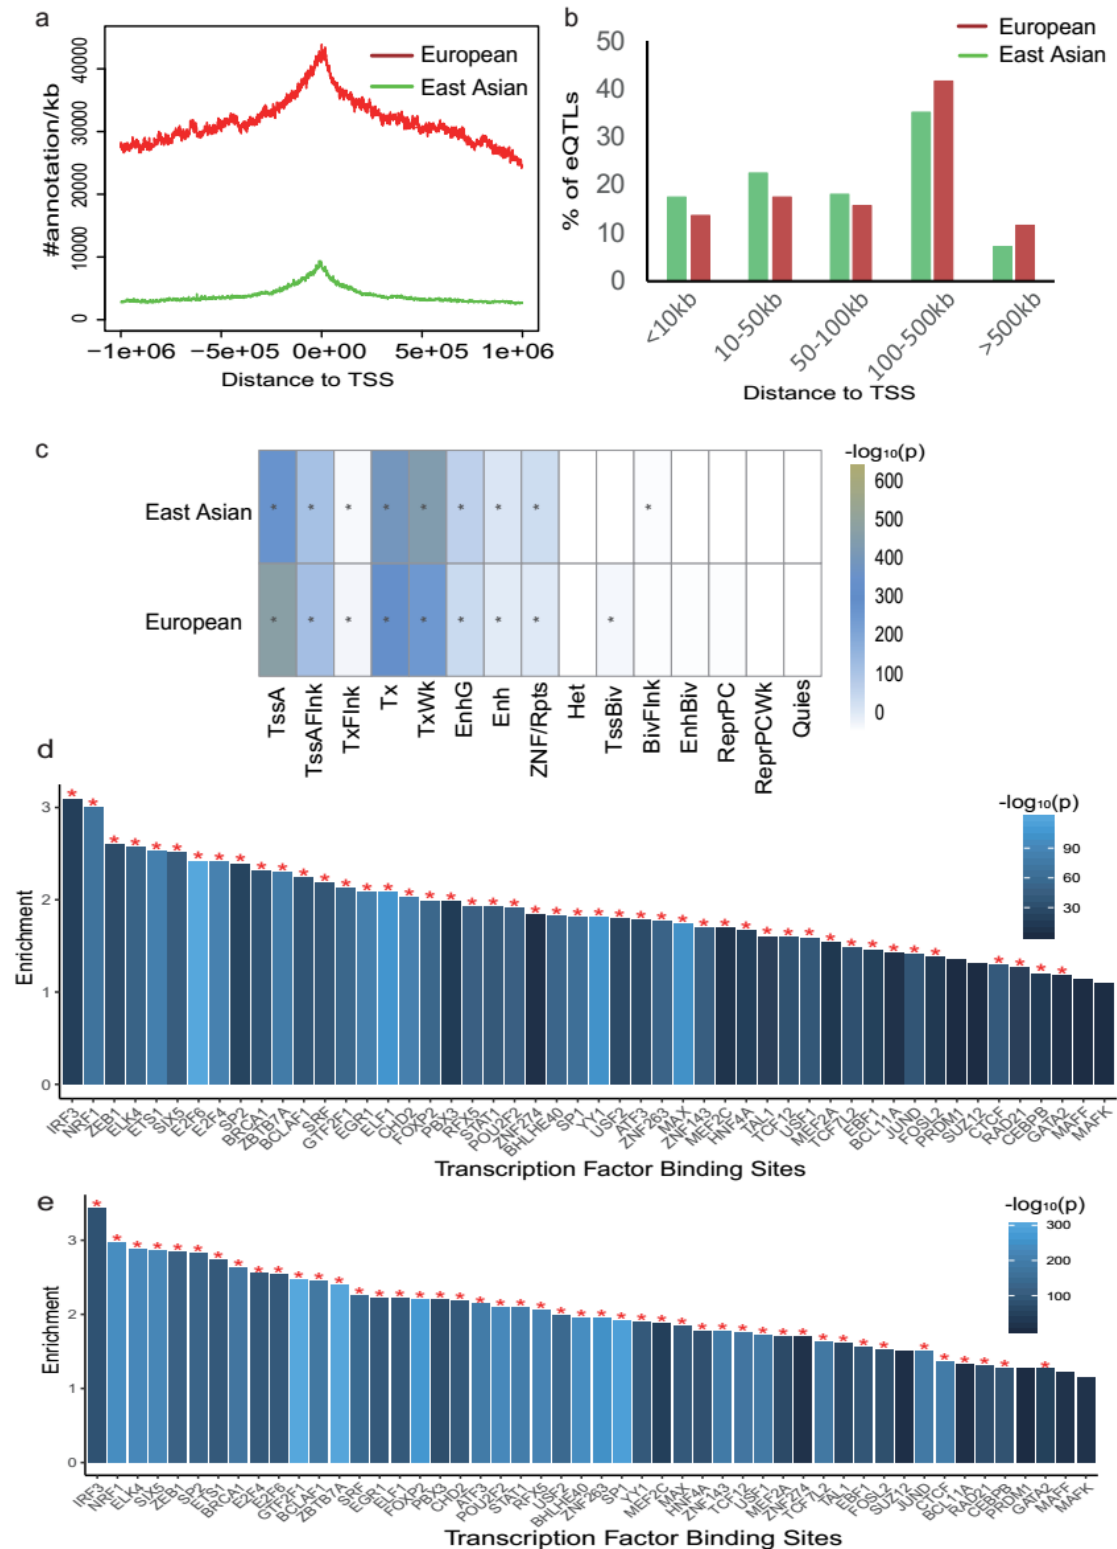

190

191 **Fig. 2 | Characterization of eQTLs.** **a**, Distance distribution of eQTLs in the East Asian  
 192 (green) and European (red) populations to the TSS as defined in Gencode v19. **b**,  
 193 Percentage of distance distribution of all cis-eQTLs in East Asian (green) and  
 194 European (red) populations. **c**, Enrichment of eSNPs in 15 core models. eSNPs in both

195 populations most significantly enriched in the TSSs, promoters, and transcribed  
196 regulatory promoters or enhancers. \* $P_{\text{Bonferroni}} < 0.05$ . **d**, Enrichments of eSNPs in  
197 experimentally discovered transcription factor binding sites in the East Asian  
198 population. **e**, Enrichments of eSNPs in experimentally discovered transcription factor  
199 binding sites in the European population. \* $P_{\text{Bonferroni}} < 0.05$ .

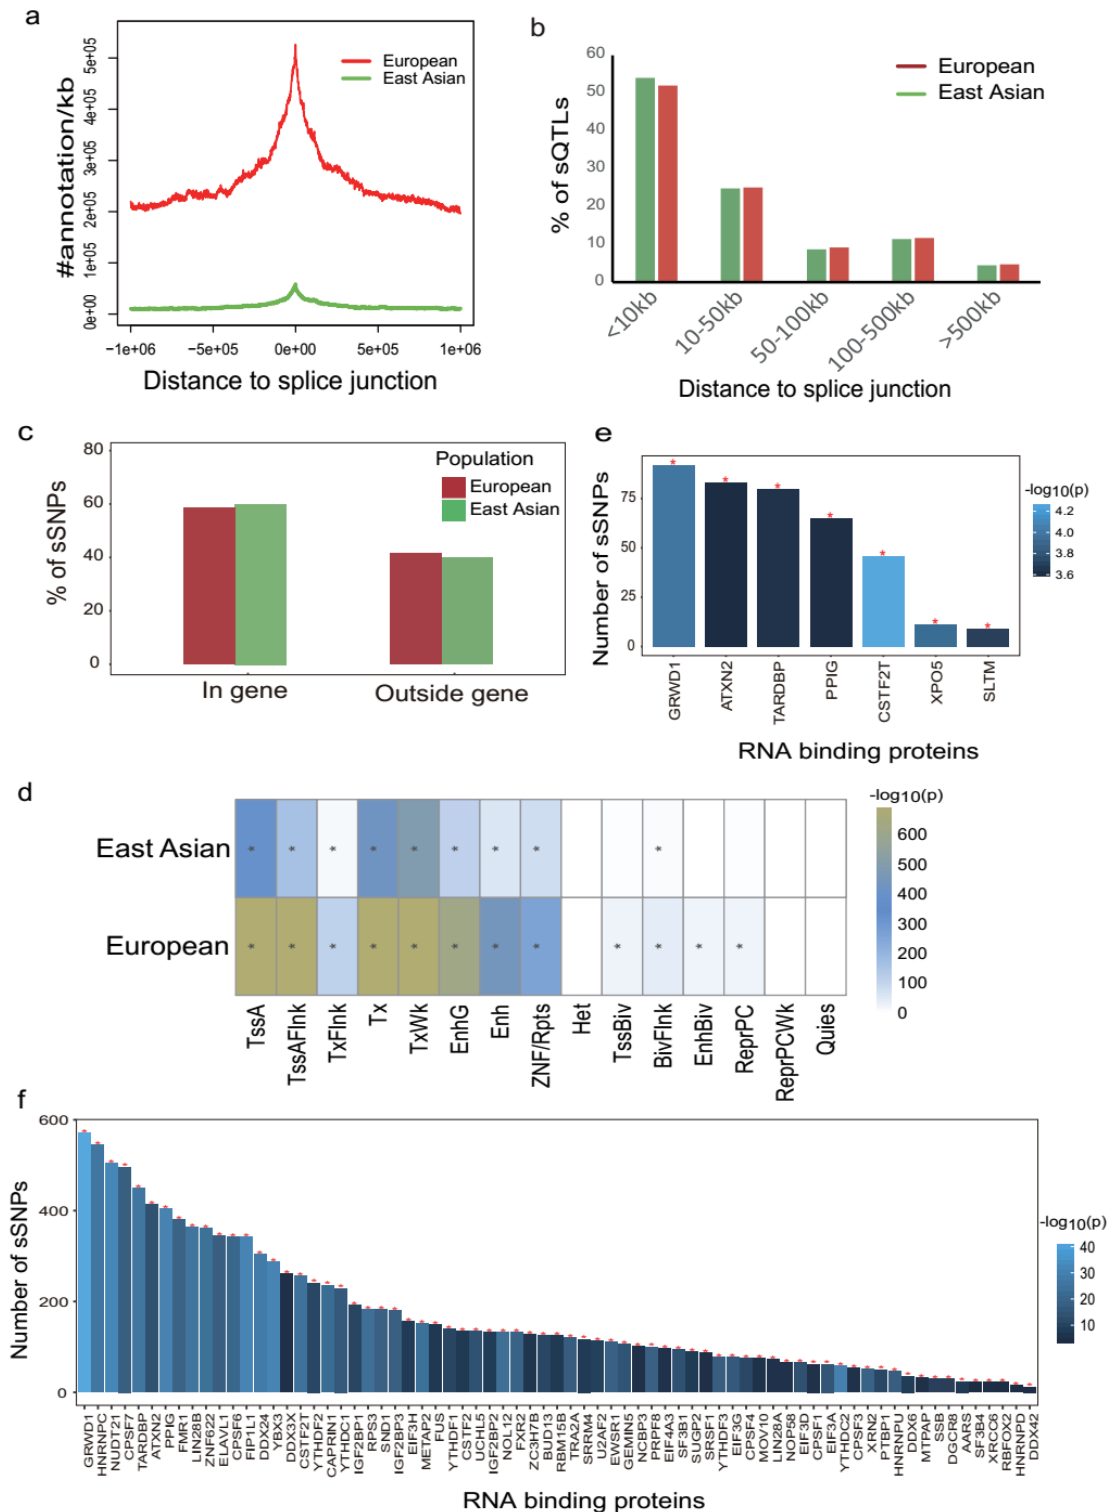

200

201 **Fig. 3 | Characterization of sQTLs.** **a**, Distance distribution of sQTLs to the splice  
 202 junction. sQTLs from the East Asian (green) and European (red) populations. **b**,  
 203 Percentage of distance distribution of all cis-sQTLs in East Asian (green) and  
 204 European (red) populations. **c**, Fraction of sQTLs where the sSNP lies within vs outside

205 its sGene. **d**, Enrichment of sSNPs in 15 core models. \* $P_{\text{Bonferroni}} < 0.05$ . **e**, RBP  
206 enrichment among the significant sSNPs in the East Asian population. **f**, RBP  
207 enrichment among the significant sSNPs in the European population. \* $P_{\text{Bonferroni}} < 0.05$ .

## 208 **Brain expression regulatory architectures are broadly preserved across EAS** 209 **and EUR populations**

210 An important aim in this study is to investigate to what degree the genetic control of  
211 gene expression and splicing in the brain varies between human ancestral populations.  
212 We first compared eGenes identified in EAS and EUR populations and found that  
213 2,650 eGenes overlapped. Most (80%) eGenes detected in the EAS population were  
214 also significant in the EUR population (Fig. 4a). Additionally, we compared the eGenes  
215 detected in the EAS population to those from GTEx adult cortices<sup>40</sup>. We found 1,289  
216 overlapping eGenes, accounting for nearly 40% between both datasets (Fig. 4b). We  
217 also compared sGenes across EAS and EUR populations. Results showed 1,779  
218 overlapped sGenes (Fig. 4c), 87% of which were shared significantly across  
219 populations.

220 We next used Storey's  $\pi_1$  statistic to assess the extent of eQTL/sQTL sharing across  
221 populations. To assess the true extent of this sharing, we performed down-sampling  
222 analysis with 100 repetitions (Methods). The fraction of eQTLs and sQTLs shared  
223 between the EAS and EUR populations was 74.8% and 78.2%, respectively (Fig. 4d,g).  
224 Moreover, we calculated the Pearson correlation of genetic effect size between shared  
225 QTLs and found that the genetic effect size between EAS and EUR populations was  
226 highly analogous ( $R_{\text{eQTL}}=0.847$ ;  $R_{\text{sQTL}}=0.898$ ; Fig. 4e,h).

227 We completed a meta-analysis, pooling results from diverse populations, to gain  
228 greater statistical power for QTL detection and to identify shared QTLs across  
229 populations. We calculated a meta p-value using METAL<sup>41</sup> for each eQTL/sQTL across  
230 populations; eQTLs or sQTLs at a meta FDR < 0.05 were referred to as 'meta

231 eQTLs/sQTLs'. Greater than 80% of these were significant across populations and  
232 showed concordant regulatory direction across populations (Extended Data Fig. 2 and  
233 Supplementary Table 2). Also, numerous new eQTL/sQTL signals were identified by  
234 meta-analysis.

235 To comprehensively compare the brain expression regulatory architecture between  
236 EAS and EUR populations, we calculated the Pearson correlation of gene expression  
237 between the two populations using shared genes. We found that gene expression was  
238 highly correlated in the two populations (Fig. 4f;  $R = 0.92$ ,  $p\text{-value} < 2.2e-16$ ), and a  
239 similar result was observed for alternative splicing ratio (Fig. 4i;  $R = 0.76$ ,  $p\text{-value} <$   
240  $2.2e-16$ ). Furthermore, we applied weighted gene co-expression network analysis  
241 (WGCNA)<sup>42</sup> and robust WGCNA to create independent gene- and isoform-level  
242 networks. We then used preservation testing to evaluate the consensus of networks  
243 constructed by each population. Preservation Z summary score of each module  
244 was  $>2$  in both the gene expression and isoform levels, showing that co-expression  
245 patterns are broadly preserved between EAS and EUR populations (Fig. 5c,d,e,f and  
246 Supplementary Table 5).

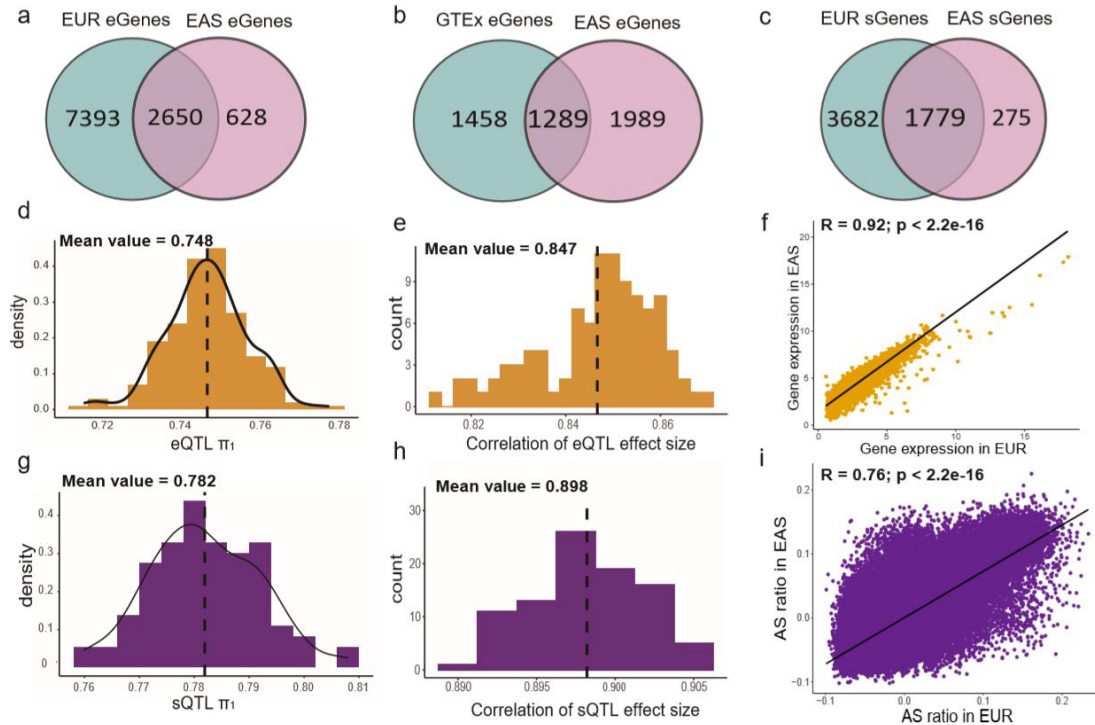

247

248 **Fig. 4 | Comparison of the regulatory pattern.** **a**, Venn Diagram for eGenes  
249 discovered in European (EUR) population vs East Asian (EAS) population. **b**, Venn  
250 Diagram for eGenes discovered in adult cortical tissue from GTEx vs EAS population.  
251 **c**, Venn Diagram for sGenes discovered in EUR population vs EAS population. **d**,  
252 Distribution of eQTL  $\pi_1$  between EAS and down-sampled EUR populations. The mean  
253  $\pi_1$  value was 0.748. **e**, Distribution of correlation coefficient between eQTL effect size.  
254 The mean correlation coefficient value was 0.847. **f**, Pearson's correlation in expressed  
255 genes between EAS and EUR populations. **g**, Distribution of sQTL  $\pi_1$  between EAS  
256 and down-sampled EUR populations. The mean  $\pi_1$  value was 0.782. **h**, Distribution of  
257 correlation coefficient between sQTL effect size. The mean correlation coefficient value  
258 is 0.898. **i**, Pearson's correlation in intron clusters between EAS and EUR populations.  
259 AS: alternative splicing.



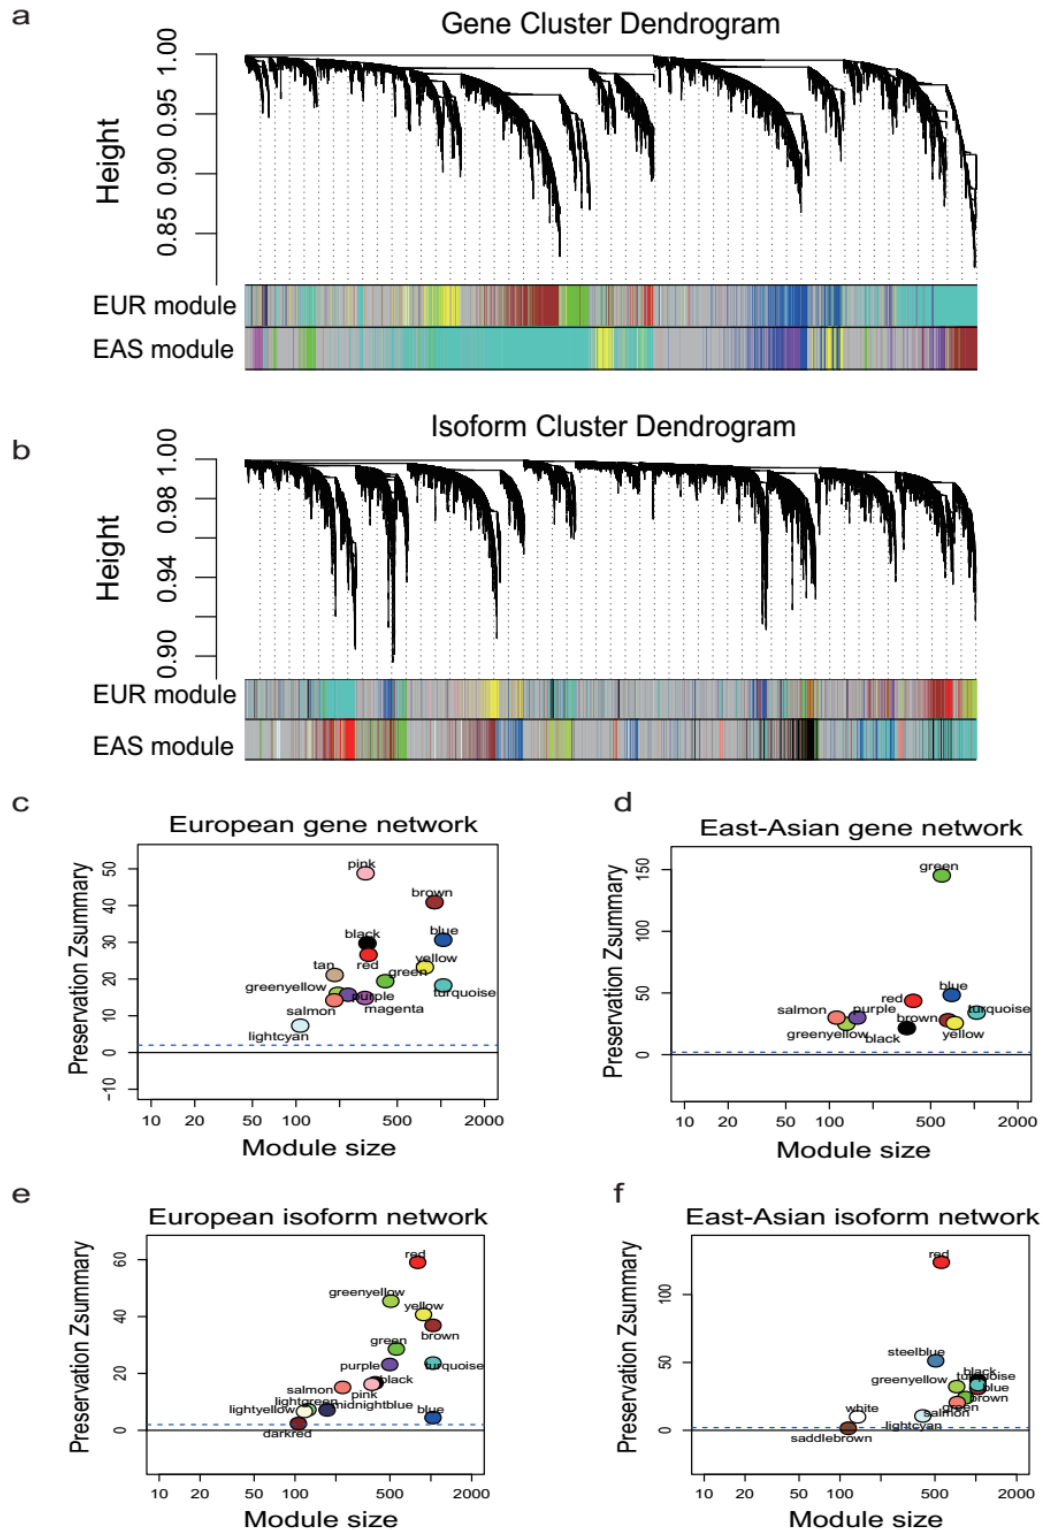

260

261 **Fig. 5 | Comparison of co-expression pattern.** **a**, Network analysis dendrogram  
262 based on hierarchical clustering of all genes by their topological overlap. Colored bars  
263 below the dendrogram show module membership. **b**, Network analysis dendrogram

264 based on hierarchical clustering of all isoforms by their topological overlap. **c**,  
265 Preservation Z summary score of each gene co-expression module in the EUR  
266 population. The x-axis is the number of genes in each module and the y-axis is Z  
267 summary score, which measures the preservation between modules. When Z  
268 summary score  $\geq 2$ , it indicates that this module was preserved in another population.  
269 The blue dashed line is the moderately conserved threshold. Each point represents a  
270 module constructed in population, labeled by color. **d**, Preservation Z summary score  
271 of each gene co-expression module in the EAS population. **e**, Preservation Z summary  
272 score of each isoform co-expression module in the EUR population. **f**, Preservation Z  
273 summary score of each isoform co-expression module in the EAS population.

#### 274 **Differences in AF and LD across populations decrease the QTL reproducibility** 275 **and the power of gene expression prediction**

276 Although the sharing ratio reached almost 80%, 20% of the QTLs are significant only  
277 in one population. We hypothesized that part of QTL differentiation is due to population  
278 divergence in AF and LD pattern across populations. To address this hypothesis, we  
279 defined EUR robust QTLs as significant QTLs detected at least 50 times in down-  
280 sampling analysis, ancestry-specific QTLs as significant in one population, and  
281 ancestry-shared QTLs as significant in both populations. We identified each of these  
282 QTL types by comparing the lists of EAS QTLs and EUR robust QTLs. To investigate  
283 the effect of AF on QTL differentiation, we estimated  $F_{ST}$  (fixation index) for each eSNP  
284 and sSNP and compared the distribution of  $F_{ST}$  between ancestry-specific and  
285 ancestry-shared QTLs (Methods). We found that ancestry-specific QTLs were  
286 significantly enriched in population-divergent SNPs ( $F_{ST} > 0.05$ ; Fisher exact test:  $P <$   
287  $2.2e-16$ ) and ancestry-shared QTLs were significantly enriched in population-  
288 convergent SNPs ( $F_{ST} < 0.05$ ; Fisher exact test:  $P < 2.2e-16$ ; Fig. 6a). To further verify  
289 our hypothesis, we separated eSNPs/sSNPs into different minor allele frequency (MAF)  
290 bins, and calculated QTL  $\pi_1$  in each bin. We found that with similar AF, QTL sharing

291 ratios were higher than cross SNPs with different AF, suggesting that the SNPs with  
292 less population divergence were more likely to be eQTLs/sQTLs shared by the two  
293 populations (Fig. 6b,c).

294 We then tested whether ancestry-specific QTL loci have unique LD patterns (Methods).  
295 Results showed LD patterns for ancestry-specific QTLs varied significantly between  
296 EAS and EUR populations (Wilcoxon tests,  $P < 0.05$ ; Fig. 6d). Further, correlation  
297 coefficients between  $F_{ST}$  and LD score were less than 0.1 ( $P < 0.01$ ), suggesting that  
298 the cross-population differences in LD patterns affect QTL differentiation independently  
299 when compared with  $F_{ST}$ .

300 Associations between SNPs and genes enable the development of predictive models  
301 that can “impute” gene expression when phenotype-related tissue types are  
302 unavailable. However, population-specific QTL signals may reduce the accuracy of  
303 gene expression prediction across populations. We hypothesize that prediction  
304 performance will be lower when a model trained on one population is used to predict  
305 gene expression in another population. To investigate, we compared gene-expression  
306 predictive performance within and across EAS and EUR populations. We used  
307 matched SNPs and genes in both populations ( $n=145$ ) to build the models ( $n = 100$ )  
308 using PrediXcan<sup>15</sup> (Methods). The Pearson correlation between predictive  
309 performance of genes in the EAS and EUR populations was 0.60 (Fig. 6e). We also  
310 found that single-population-trained models had significantly decreased performance  
311 when predicting gene expression in another population (Wilcoxon tests, EAS Model:  $P$   
312 =  $4.577 \times 10^{-12}$ ; EUR Model:  $P < 2.2 \times 10^{-16}$ ; Fig. 6f; Supplementary Table 3)

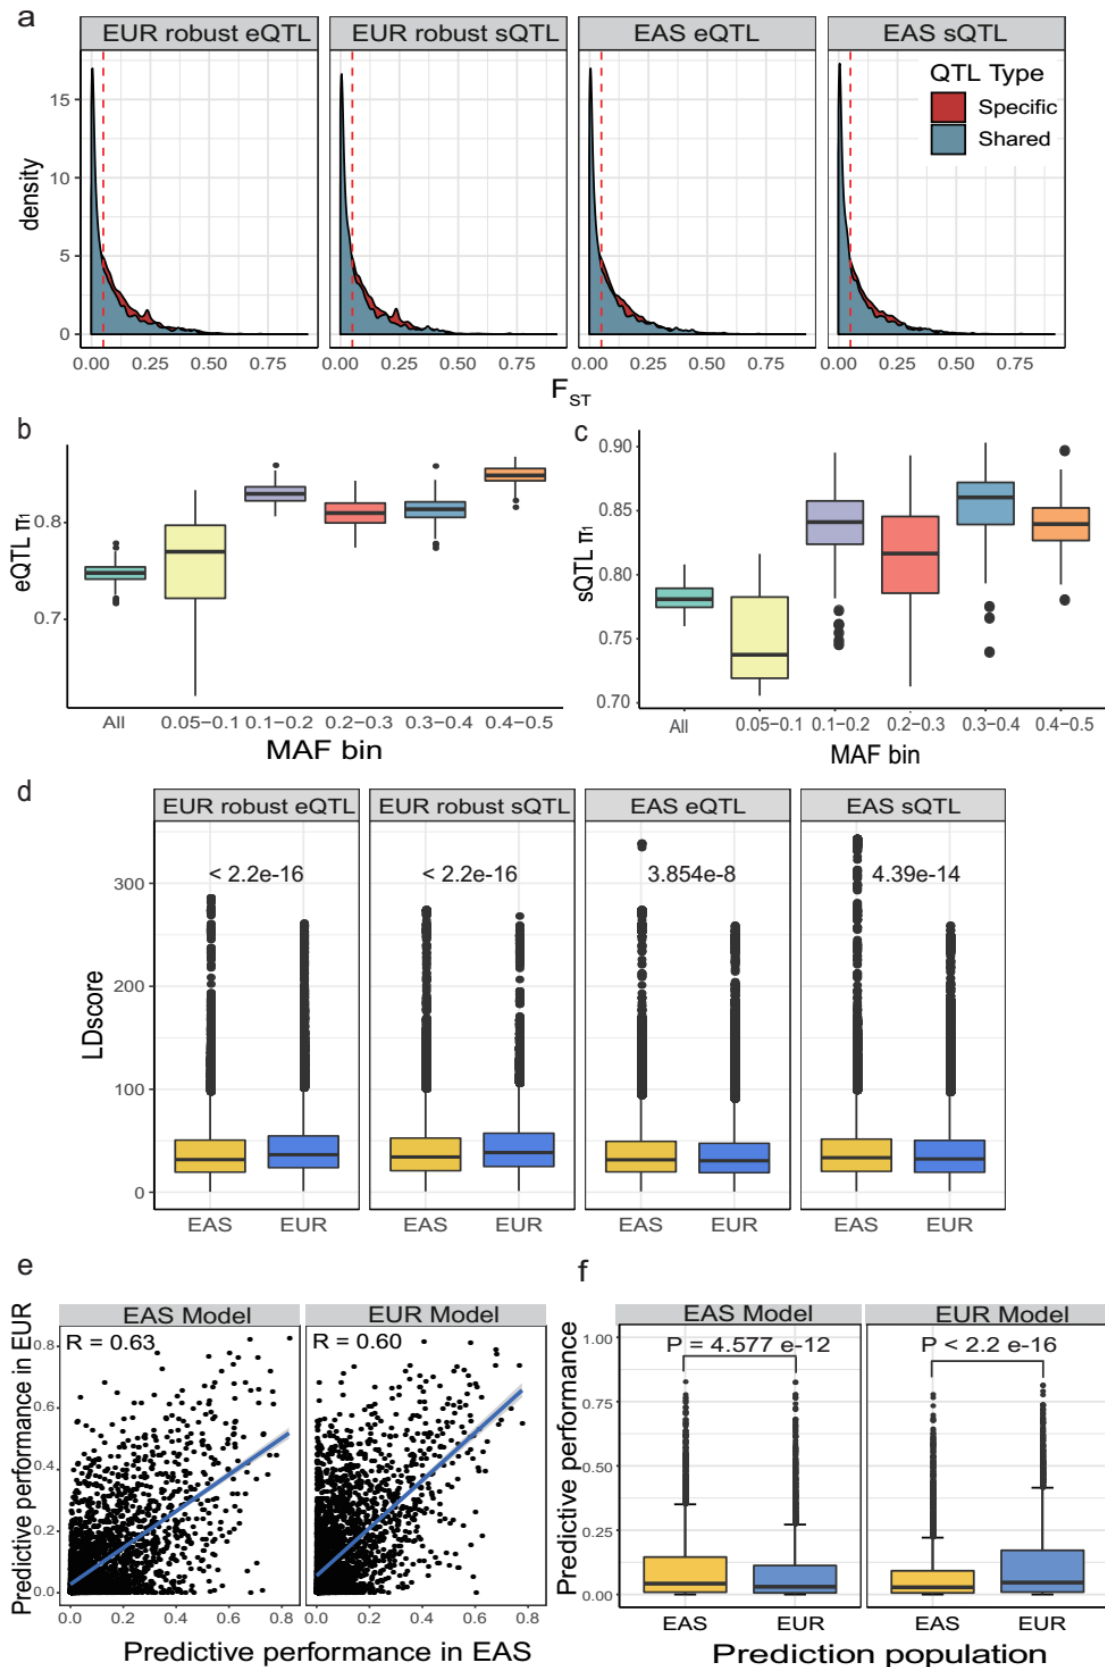

313

314 **Fig. 6 | AF and LD differences contribute to QTL differences between populations.**

315 **a**, Comparison of  $F_{ST}$  between ancestry-shared and ancestry-specific QTLs. Robust

316 QTL: detected as significant QTLs at least 50 times in down-sampling analysis. **b**,  
317 eQTL  $\pi_1$  in different MAF bins. **c**, sQTL  $\pi_1$  in different MAF bins. **d**, Linkage  
318 disequilibrium score distribution comparison for ancestry-specific QTLs between EAS  
319 and EUR populations. **e**, Comparison of predictive performance for each gene ( $R^2$ )  
320 between EAS and EUR populations in different prediction models (EAS and EUR  
321 model). The identity line is shown in blue. **f**, Comparison of predictive performance  
322 between genes in different prediction models.

### 323 **Synapse- and GTPase-related pathway implicated in SCZ risk across populations**

324 eQTLs and sQTLs detected in the human brain can help to decipher the unlock  
325 biological mechanisms of SCZ. To examine whether QTL results from the phenotype-  
326 linked population explains more disease signals and SNP heritability than those from  
327 disparate populations, we first collected SCZ GWAS summary statistics for both  
328 ancestral populations from the Psychiatric Genomics Consortium (PGC)<sup>43,44</sup>. We then  
329 compared GWAS signal enrichment using partitioned LD-score regression (LDSR)<sup>45</sup>  
330 (Methods). For the EAS GWAS summary data, eQTLs/sQTLs detected in the EAS  
331 population showed greater significant enrichment in GWAS signals than those from  
332 the EUR population (Welch Modified Two-Sample t-Test  $P < 0.001$ ) and vice versa  
333 (Welch Modified Two-Sample t-Test  $P < 0.001$ ; Fig. 7a and Supplementary Table 6).  
334 We corrected for possible sample size variance bias by calculating the enrichment of  
335 robust EUR QTLs, and the results agreed with previous reports (Extended Data Fig.  
336 3a,b).

337 It was next necessary to evaluate whether observed differences represented true  
338 etiologic heterogeneity of SCZ across populations. To achieve this, we used regulatory  
339 trait concordance (RTC)<sup>46</sup> and summary data-based Mendelian randomization (SMR)<sup>9</sup>  
340 to prioritize SCZ candidate risk genes (Methods). We prioritized 199 SCZ candidate  
341 risk genes, including 173 genes in the EUR population and 32 in the EAS population  
342 (Supplementary Table 7; Supplementary Table 8 and Fig. 7b). Six of the 199 were

343 identified in both populations (CNNM2, C12orf65, MPHOSPH9, MARCKSL1P1,  
344 C2orf47, and ABCB9). Other genes were identified within a single population. For  
345 example, C4A was identified as a risk gene in the EUR population (Fig. 7f) by  
346 integrating the eQTL signals, while CYP17A1 was identified as a risk gene in the EAS  
347 population by integrating the eQTL signals (Fig. 7g). Comparing published SCZ risk  
348 genes with the 199 candidate genes we identified, 77 of the EUR candidate genes and  
349 10 of the EAS candidate genes aligned (Methods and Supplementary Table 9).

350 Along with peripheral genes, these candidate genes form a network that fulfills specific  
351 functional roles. To better characterize the biological function of these candidate genes,  
352 we analyzed the enrichment of candidate genes having previously constructed  
353 networks (Methods). We tested whether modules were significantly enriched in  
354 candidate genes for both EAS and EUR populations, but none were. We also tested  
355 whether any consensus modules (preserved in both populations) were significantly  
356 enriched with candidate genes present in both populations. One consensus module  
357 was significantly enriched in candidate genes from the combined populations (Fig. 7c;  
358  $p$ -value = 0.01). Enrichment analysis showed function related to synapse and GTPase  
359 pathways, including regulation of chemical synaptic transmission, neuron projection  
360 development, synapse structure or activity, small GTPase mediated signal  
361 transduction, and GTPase binding (Extended Fig. 3d and Supplementary Table 10).

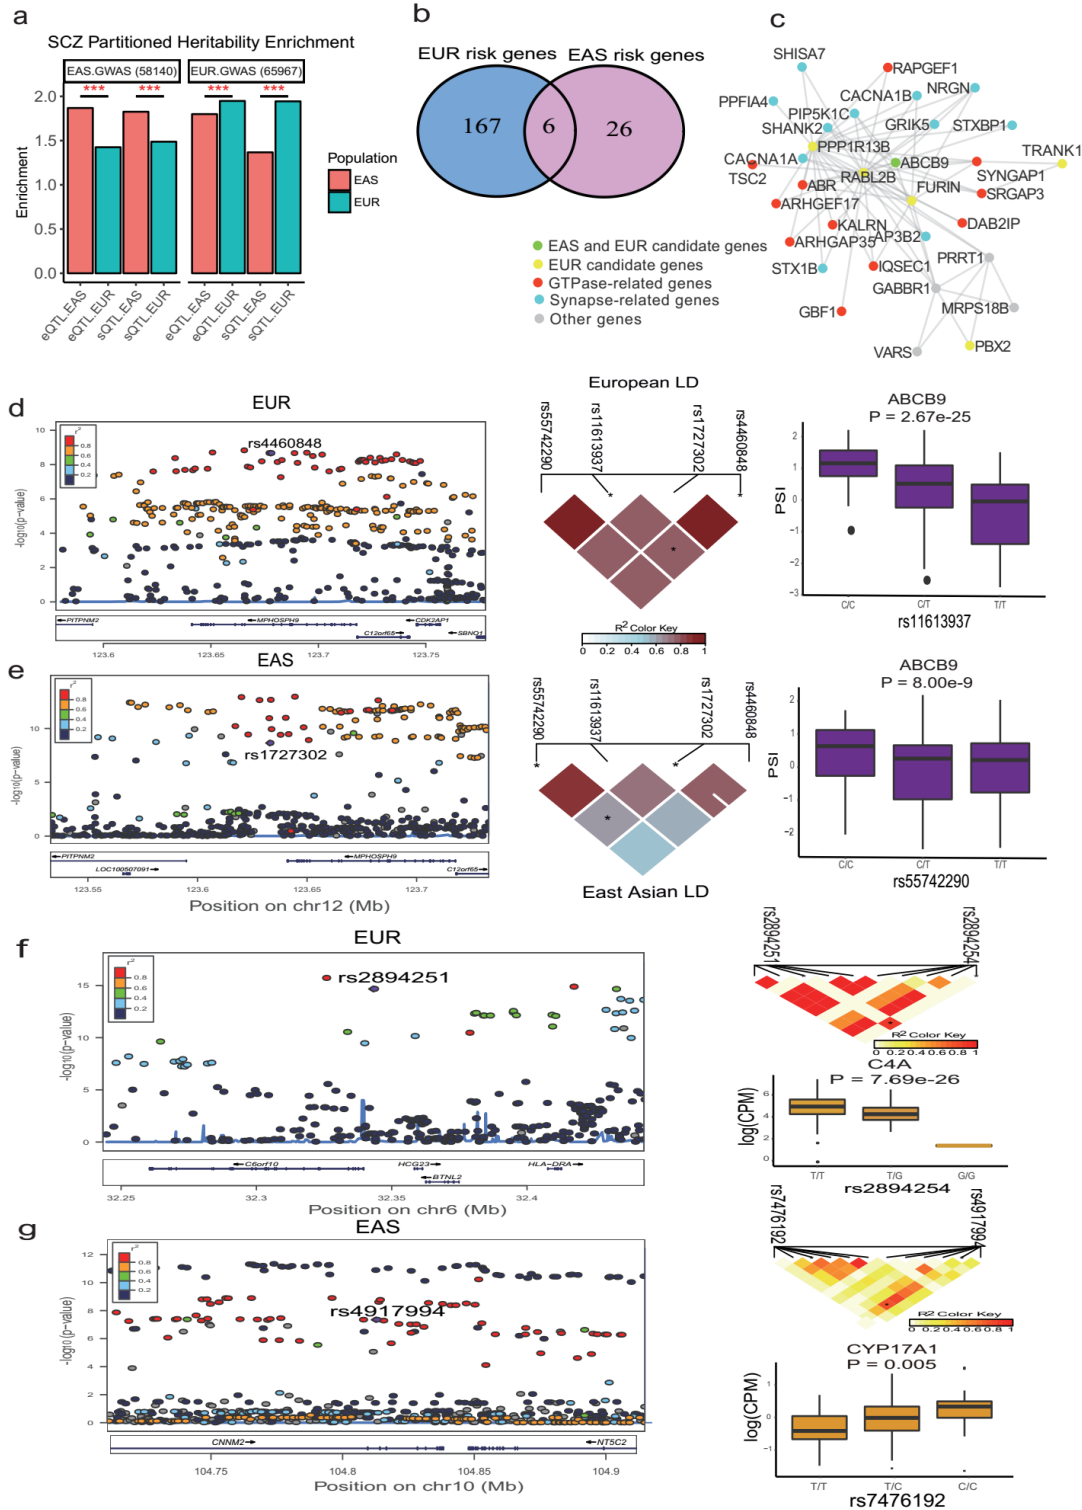

362

363 **Fig. 7 | Explanation of SCZ GWAS signals and prioritization of candidate genes.**

364 **a**, GWAS enrichment results from LDSR. \*\*\*: Welch Modified Two-Sample t-Test P <

365 0.001. **b**, Venn plot for SCZ risk genes in EUR and EAS populations with combined

366 RTC and SMR results. **c**, The sub-network of yellow module. **d-e**, Examples of shared

367 SCZ risk genes. **f**, Example for EUR-specific risk gene, C4A. **g**, Example for EAS-  
368 specific risk gene, CYP17A1. LDSR: LD score regression.

## 369 **Discussion**

370 We developed a novel brain transcriptome data set and compiled the first genome-  
371 wide brain regulatory map of the prefrontal cortex from a solely EAS population. We  
372 identified 3,278 eQTL and 4,726 sQTL signals that reached a genome-wide level of  
373 significance. Detected eSNPs and sSNPs corresponded to previous reports<sup>38,40,47,48</sup>  
374 with significant enrichment in active functional regions such as promoters and  
375 enhancers. Comparing the EAS data with the PsychENCODE/BrainGVEX-derived  
376 EUR data, we found most regulatory elements common to both populations. Moreover,  
377 by integrating QTL signals with summary statistics from SCZ GWAS, we observed  
378 synapse- and GTPase-related pathways involved in the development of SCZ in both  
379 populations.

380 This study demonstrated convergent transcriptional regulatory architectures between  
381 EAS and EUR populations through multiple lines of evidence. Meta-analysis revealed  
382 approximately 80% of QTLs were shared between populations. Moreover, several  
383 relational analyses suggest a high degree of congruence between EAS and EUR  
384 populations, including the  $\pi_1$  statistic (eQTL=0.748; sQTL=0.782), correlations  
385 between populations for genetic effect size (eQTL=0.847; sQTL=0.898) and  
386 correlations for gene expression and co-regulatory networks. Our study of post-  
387 mortem brain tissue concurs with studies based on whole blood and liver tissue in  
388 which EAS and EUR cis-eQTL replication rates equaled 60%<sup>49</sup> and 40%<sup>50</sup> respectively.  
389 Our study parallels previous comparisons of the genetic control of gene  
390 expression<sup>24,50,51</sup>, methylation<sup>52</sup>, and chromatin accessibility<sup>53</sup> generated from  
391 lymphoblastoid cell lines in diverse populations from worldwide reference panels<sup>54-56</sup>,  
392 showing that regulatory patterns are shared across populations.



393 Our proposal that some QTLs have population-specific effects is not unique <sup>24,53</sup>.  
394 Seeking to find the biological mechanisms underlying these divergent effects, we  
395 compared  $F_{ST}$  and LD score distribution for ancestry-specific QTLs across populations.  
396 Here, we found significant differences. These results indicate that a degree of QTL  
397 differentiation signals divergence in AF and LD. Evidence suggests that such genetic  
398 differentiation in ancestral populations is due primarily to natural selection<sup>57,58</sup>. Besides,  
399 contemporary populations descend from dramatically smaller migratory populations  
400 (bottleneck effect), hence, population-specific QTLs could arise from bottleneck effect  
401 and environmental factors including climate, diet, and pathogenic microorganisms.

402 Population-specific QTLs have important implications for predictive modeling. QTL  
403 signals lay the foundation for predictive models and assist in imputing gene expression  
404 when tissues relevant to phenotypes are unavailable. Our gene prediction model that  
405 was trained in one population decreased their prediction performance when predicting  
406 gene expression for other populations at a ratio of 14% to 33% respectively. This  
407 agrees with several recent studies reporting superior accuracy of prediction models in  
408 target populations with ancestry comparable to the discovery population<sup>14,21-23</sup>.  
409 Therefore, population-specific predictive models are integral for transcriptome  
410 mapping of the human brain.

411 Population-specific regulatory regions may harbor a portion of the disease risk. This  
412 may limit QTL's utility in interpreting GWAS signals in disparate populations. We  
413 compared the enrichment of QTL signals in SCZ GWAS across populations and found  
414 more significant enrichment of eQTLs/sQTLs in the discovery population than in the  
415 disparate populations. Similar results have been reported in Type 2 diabetes<sup>59</sup>. These  
416 findings highlight the importance of using GWAS to interpret QTLs from the target  
417 population in accurately explaining the disease signals within that population.

418 Since SCZ occurs with similar prevalence and a genetic basis broadly shared across  
419 populations<sup>43,60</sup>, we would expect distinct groups to share many risk genes.

420 Surprisingly, we observed only six of the 199 SCZ risk genes in common between EAS  
421 and EUR populations. Nevertheless, this finding should not be interpreted to mean that  
422 EAS and EUR populations carry entirely different risk genes. For, we found that almost  
423 70% of the SNPs that are linked to regulating population-specific SCZ risk genes vary  
424 in AF and LD patterns across populations. For example, we identified the EUR-specific  
425 risk gene C4A, a target of extensive scrutiny in association with SCZ<sup>61-63</sup>. C4A localizes  
426 to the MHC class III region on chromosome 6, which is strongly associated with SCZ  
427 and which hosts a EUR-specific LD pattern. The corresponding GWAS signal  
428 rs2894251 was significant within the EUR population ( $P = 2.144 \times 10^{-15}$ ; MAF = 0.12) but  
429 not so in the EAS population ( $P = 0.05156$ ; MAF = 0.02). Although the associated  
430 eSNP rs2894254 is extremely uncommon in the EAS population (MAF < 0.001), it has  
431 an MAF of 6% in the EUR population. These results suggest that at least some  
432 differences in EAS and EUR SCZ risk genes are due to low AF and disparate LD  
433 patterns, which may account for the loss of risk genes. Risk genes were more readily  
434 detectable in both populations when they were present in similar or higher AFs with  
435 similar LD patterns. Yet, many SCZ risk genes are evident within low frequencies too,  
436 hindering consistent detection.

437 It is well known that complex molecular networks and cellular pathways fuel disease  
438 susceptibility and development<sup>64,65</sup>. Therefore, we exploited pathway enrichment  
439 analyses of identified risk genes and co-regulated genes to explore the mechanisms  
440 behind SCZ. SCZ risk genes were significantly enriched in one consensus module  
441 (module yellow) for both ancestral populations. This module was enriched for an array  
442 of established SCZ modular pathways, including synapse- and GTPase-related  
443 pathways<sup>66-70</sup>. Pathways related to neuron-to-neuron, postsynaptic density, and  
444 asymmetric synapses are established suspects in genetic risk of SCZ. A meta-analysis  
445 showed a significant decrease in the density of postsynaptic elements in SCZ patients  
446 compared to healthy controls<sup>69</sup>. GTPase-related pathways, including regulation of

447 small GTPase-mediated signal transductions and GTPase binding, have also been  
448 implicated in SCZ. A previous study shows that a missense polymorphism (H204R) of  
449 a Rho GTPase-activating protein is associated with schizophrenia in men<sup>70</sup>. Our results  
450 support the premise that synapse-related and GTPase-related pathways have an  
451 important role in the etiology of schizophrenia for both EAS and EUR populations.

452 Our study showed how both eQTLs and sQTLs benefit the study of underlying disease  
453 mechanisms. We discovered how heritability explained by eQTLs and sQTLs is similar  
454 in both EAS and EUR populations. Recent studies have examined the contribution of  
455 regulatory variants to SCZ, educational attainment, and autism spectrum disorder  
456 (ASD), concluding that sQTLs contribute comparably or with even greater magnitude  
457 than eQTLs<sup>8,14,38</sup>. Additionally, we found that although only 14% of SCZ risk genes  
458 were identified by both eQTL and sQTL signals (Extended Data Fig. 3c,d), 40% of the  
459 SCZ risk genes identified by integrating either eQTLs or sQTLs had also been reported  
460 as SCZ risk genes in previous literature<sup>66,71-77</sup>. This result indicates that eQTLs and  
461 sQTLs can identify distinct risk genes which facilitate our understanding of disease  
462 mechanisms.

463 In general, our results show the transcriptional architecture of expression regulation  
464 and the underlying SCZ biology converging between the EAS and EUR populations.  
465 Synaptic- and GTPase- related pathways are likely suspects in the pathogenesis of  
466 SCZ in both populations. Future studies should assemble a range of large samples  
467 from worldwide ancestral populations to establish whether these findings are  
468 applicable globally. If so, mechanistic studies could narrow in on fewer pathways  
469 toward extracting the pathogenesis of SCZ with greater precision.

## 470 **Methods**

### 471 **EAS sample collection, sequencing and EUR public data collection**

472 We collected 151 prefrontal cortical samples of Han Chinese descent from the National  
473 Human Brain Bank for Development and Function according to the standardized  
474 operational protocol of China Human Brain Banking Consortium<sup>78,79</sup>, and under the  
475 approval by the Institutional Review Board of the Institute of Basic Medical Sciences,  
476 Chinese Academy of Medical Sciences, Beijing, China (Approval Number: 009-2014).  
477 We sequenced 151 samples following the BGISEQ-500 protocol outsourced to BGI,  
478 WGS and transcriptome sequencing was performed on BGISEQ-500 platform with an  
479 average depth of 10X (Supplementary Table 1 and Supplementary Note). To assess  
480 differences in ancestry, we also downloaded and processed raw whole genome and  
481 RNA-seq data for 407 European ancestry from PsychENCODE/BrainGVEX (Synapse  
482 number: syn4590909).

#### 483 **EAS data quality control**

484 Raw sequencing reads were filtered to get clean reads by using SOAPnuke (v1.5.6)<sup>80</sup>,  
485 and used FastQC to evaluate the quality of sequencing data via several measures,  
486 including sequence quality per base, sequence duplication levels, and quality score  
487 distribution for each sample. The average quality score for overall DNA and RNA  
488 sequences show high scores above 30, indicating that a high percentage of the  
489 sequences had high quality (Supplementary Note).

#### 490 **Variant identification**

491 Clean DNA sequencing reads were mapped to the human reference genome hg19  
492 (GRCh37) using BWA-MEM algorithm (BWA v. 0.7.128)<sup>81</sup>. Ambiguously mapped reads  
493 (MAPQ <10) and duplicated reads were removed using SAMtools v. 1.29<sup>82</sup> and  
494 PicardTools v. 1.130 (<http://picard.sourceforge.net/>) respectively. Genomic variants  
495 were called following the Genome Analysis Toolkit software (GATK v. 3.4–46) best  
496 practices<sup>83</sup>. The ancestry of each sample was inferred using data from the 1000  
497 Genomes Project, and no sample was excluded. For EAS cohort, genotypes were  
498 imputed into the 1000 Genomes Project phase 3 EAS reference panel by chromosome

499 using Michigan Imputation Server<sup>84</sup> and subsequently merged. Imputed genotypes  
500 were filtered for  $R^2 < 0.3$ , Hardy-Weinberg equilibrium p-value  $< 1 \times 10^{-6}$  and MAF  $<$   
501 0.05, resulting in ~6.4 million autosomal SNPs. For EUR cohort, genotypes were  
502 imputed into the HRC reference panel, and removed SNPs with  $R^2 < 0.3$ , HWE p-value  
503  $< 1 \times 10^{-6}$  or MAF  $< 0.01$ .

#### 504 **Gene-expression quantification and filter**

505 Mapping of RNA-sequencing reads was completed using STAR (2.4.2a)<sup>85</sup> and the  
506 quantification of genes and transcripts was with RSEM (1.3.0)<sup>86</sup>. Raw read counts were  
507 log-transformed by R package VOOOM first<sup>87</sup>, filtering those with  $\log_2(\text{CPM}) < 0$  in more  
508 than 75% of the samples. We removed all transcripts derived from mitochondrial DNA  
509 and X and Y chromosomes. Samples with a Z-score (assessing connectivity between  
510 samples) lower than -3 were removed. Quantile normalization was then used to  
511 equalize distributions across samples.

#### 512 **Intron cluster quantifications**

513 We used Leafcutter to quantify clusters of variably spliced introns<sup>36</sup>. A cluster consists  
514 of overlapping introns that share a splice site. The usage of each intron was first  
515 quantified using previously aligned FASTQ files from STAR. Overlapping introns were  
516 then grouped with the settings of 50 reads per cluster and a maximum intron length of  
517 500kb.

#### 518 **Co-expression network analysis**

519 To place results from individual genes within their systems-level network architecture,  
520 we performed WGCNA<sup>42</sup> using human brain RNA-seq data. Individual (covariate-  
521 regressed) expression datasets were combined using the 16,266 genes present  
522 across all studies. The resulting normalized mega-analysis expression set was used  
523 for all downstream network analyses. We also using robust WGCNA (rWGCNA) to

524 reduce the influence of potential outlier samples on the network architecture. Module  
525 robustness was ensured by randomly resampling (2/3 of the total) from the initial set  
526 of samples 100 times. This was followed by consensus network analysis, a meta-  
527 analytic approach to define modules using a consensus quantile threshold of 0.2. The  
528 parameter of rWGCNA was consistent with normal WGCNA (Supplementary Note).

### 529 **eQTL and sQTL mapping**

530 We used PEER<sup>35</sup> to identify hidden confounders and evaluated the correlation between  
531 the known factors (such sex and age) with hidden confounders. We then performed  
532 cis-eQTL and cis-sQTL mapping using QTLtools<sup>34</sup>, adjusting for PEER factors  
533 (Supplementary Note), with a defined cis window of one megabase up- and  
534 downstream of the gene/intron cluster body. QTLtools was run in nominal pass mode  
535 to detect all available QTLs. QTLtools was also run in the permutation pass mode to  
536 identify the best nominal associated SNP per phenotype and with a beta approximation  
537 to model the permutation outcome. P-values were then multiple testing corrections  
538 using the “q-value” package in R. We define FDR q-value < 0.05 as significant QTL.

### 539 **Functional enrichment**

540 We performed functional enrichment of both eQTLs and sQTLs using GREGOR<sup>39</sup>  
541 (Genomic Regulatory Elements and Gwas Overlap algoRithm) to evaluate the  
542 enrichment of variants in genome-wide annotations. GREGOR calculated the  
543 enrichment value based on the observed and expected overlap within each annotation.  
544 We downloaded the 15-state ChromHMM model BED (Browser Extensible Data) files  
545 from the Roadmap Epigenetics Project<sup>88</sup>. We also downloaded 78 consensus  
546 transcription factor and DNA-protein binding site BED files existing in multiple cells<sup>89</sup>  
547 and then filtered to 50 binding proteins that showed cortical brain expression in EAS  
548 and EUR populations data. Lastly, we obtained 171 human RBP site BED files from  
549 POSTAR2 database, which was developed as the updated version of CLIPdb and

550 POSTAR and provides the largest collection of RBP binding sites and functional  
551 annotations<sup>90</sup>.

## 552 **The fraction of shared eQTL/sQTL between EAS and EUR population**

553 Sharing rate was assessed from all significant eQTLs/sQTLs in the discovery dataset  
554 by estimating the proportion of true associations ( $\pi_1$ ) on the distribution of  
555 corresponding p-values of the overlapping eQTLs /sQTLs in the replication dataset<sup>93</sup>.  
556 To avoid the influence of sample size in pairwise comparison and get the true  
557 replication rate, we randomly selected a subset of European samples (n=151),  
558 followed the same pipeline to detect QTLs, and calculated the correlation of genetic  
559 effect size of shared eQTL/sQTL between EAS and EUR populations, repeating 100  
560 times. We calculated  $\pi_1$  and used the mean value of  $\pi_1$  to assess reproducibility  
561 between EAS and EUR.

## 562 **Network preservation analysis**

563 To generate population-specific networks, we compared networks between  
564 constructed EAS and EUR populations by individual. We then used WGCNA-  
565 integrated function (modulePreservation) to calculate module preservation statistics  
566 and applied the Z summary score (Z-score) to evaluate whether a module was  
567 conserved or not.

## 568 **F<sub>ST</sub> analysis**

569 We used the EAS and EUR panels from the 1000 Genomes Project Phase 3 to  
570 investigate the Fixation index (F<sub>ST</sub>). We estimated F<sub>ST</sub> using vcfTools<sup>91</sup> following the  
571 Weir and Cockerham approach<sup>92</sup> for each eSNP and sSNP.

572 We defined population-divergent SNPs as those with F<sub>ST</sub> >= 0.05 and population-  
573 shared SNPs as those with F<sub>ST</sub> < 0.05. To collect the list of ancestry-specific QTLs and

574 ancestry-shared QTLs, first, we defined EUR robust QTLs as those that were called  
575 significant at least 50 times in down-sampling analysis, as well as ancestry-specific  
576 QTLs (significant in one population) and ancestry-shared QTLs (significant in these  
577 two populations), by comparing the list of EAS QTLs and EUR robust QTLs. Finally,  
578 we performed Fisher's exact test between ancestry-specific QTLs and population-  
579 divergent SNPs, as well as population-shared SNPs and ancestry-shared QTLs to test  
580 the contribution of AF in QTL comparison.

### 581 **LD pattern comparison**

582 We calculated the LD score for each SNP as the sum of the LD  $r^2$  between the focal  
583 SNP and all flanking SNPs within a 1cM window within the corresponding 1000G EAS  
584 and EUR genotype data. We then mapped ancestry-specific eSNPs and sSNPs into  
585 LD-score files to obtain the LD score for each ancestry-specific eSNPs or sSNPs in  
586 each population. We then performed Wilcox testing to evaluate whether the mean  
587 value of the LD score was significantly varied between populations.

### 588 **Gene-expression prediction**

589 We used matched SNPs and genes from the EAS and EUR populations using  
590 matching sample sizes ( $n=145$ ) to build the gene-expression prediction model. We  
591 separated each population into training and validation datasets (100 for training and  
592 45 for validation). Prediction models were built using PrediXcan<sup>15</sup> (Elastic Net) for both  
593 populations. Predictive performance ( $R^2$ ) was measured within each population using  
594 nested cross-validation. Wilcoxon tests measured any significant difference in  
595 prediction performance across populations.

### 596 **Partitioned LDSC**

597 Partitioned LD score regression v1.0.1 was used to measure the enrichment of GWAS  
598 summary statistics in each functional category by accounting for LD<sup>45</sup>. Brain QTL



599 annotations were created by eSNP and sSNP, mapped to the corresponding 1000  
600 Genome reference panel. LD scores were calculated for each SNPs in the QTL  
601 annotation using an LD window of 1cM in 1000 Genomes European Phase 3 and 1000  
602 Genomes Asian Phase 3 separately. Enrichment for each annotation was calculated  
603 by the proportion of heritability explained by each annotation divided by the proportion  
604 of SNPs in the genome falling in that annotation category. We then applied Welch  
605 Modified Two-Sample t-Test on enrichment values generated from QTLs in the two  
606 populations.

### 607 **Colocalization**

608 We used the conditional association as described in Nica *et al.*<sup>46</sup> to test for evidence of  
609 colocalization. This method compares the p-value of association for the lead SNP of  
610 an eQTL or sQTL before and after conditioning on the GWAS hits. The equation for  
611 the regulatory trait concordance (RTC) Score is as follows:  $RTC = (N_{SNPs} \text{ in an LD}$   
612  $\text{block} / \text{Rank}_{GWAS\_SNP}) / N_{SNPs} \text{ in an LD block}$ . The rank denoted the number of SNPs,  
613 which when used to correct the expression data, have a higher impact on the QTL than  
614 the GWAS SNPs (i.e.,  $\text{Rank}_{GWAS\_SNP} = 0$  if the GWAS SNP is the same as the eQTL or  
615 sQTL SNP and  $\text{Rank}_{GWAS\_SNP} = 1$  if, of all the SNPs in the interval, the GWAS SNP has  
616 the largest impact on the eQTL or sQTL). RTC values close to 1.0 indicated causal  
617 regulatory effects. A threshold of 0.9 was used to select causal regulatory elements.

### 618 **Prioritizing genes underlying GWAS hits**

619 We applied an SMR<sup>9</sup> method on EAS and EUR SCZ GWAS summary data to prioritize  
620 candidate genes. We used nominally significant QTLs identified in the previous  
621 analysis (FDR < 0.05), containing thousands of unique probes with filtered GWAS  
622 summary data ( $p < 0.01$ ) to perform the SMR test. In general, we use the default  
623 parameters suggested by the developers of the SMR software. These included the  
624 application of heterogeneity independent instruments (HEIDI) testing, filtering out hits

625 that arose from significant linkage with pleiotropically associated variants (LD cutoff of  
626  $P = 0.05$  in the HEIDI test, as suggested by SMR). Genes with an empirical  $P$  passed  
627 Bonferroni correction in the SMR test and a  $P > 0.05$  in the HEIDI test were considered  
628 as risk genes.

### 629 **Schizophrenia-related signals**

630 The schizophrenia risk gene sets were collected from publications and databases. For  
631 gene analysis, we collected these genes and converted them to Ensembl Gene IDs in  
632 Gencode (hg19) using BioMart. We examined whether the risk genes meet one of  
633 these criteria: (1) affected by copy number variants (CNVs)<sup>71</sup>; (2) identified by linkage  
634 and association study<sup>72-74</sup>; (3) had de novo variants from NP de novo database<sup>75</sup>; (4)  
635 identified by convergent functional genomics (CFG)<sup>76</sup>; (5) identified by Pascal gene-  
636 based test<sup>76</sup>; or (6) expressed differentially in SCZ<sup>66,77</sup>.

### 637 **Module enrichment**

638 Module functional enrichment of Gene Ontology pathways was assessed with GO-  
639 Elite v1.2.5<sup>93</sup> as well as using the clusterProfiler<sup>94</sup> R package, using GO and KEGG  
640 databases. For gProfiler, “moderate” hierarchical filtering was used. A custom  
641 background set consisted of 10,387 genes present across all studies and microarray  
642 platforms. The top pathways were those reaching significance with FDR-adjusted  $P <$   
643 0.05. Module eQTL and candidate genes enrichment were assessed with Fisher exact  
644 testing in R.

## 645 **Acknowledgments**

646 We thank all donors and their families. We thank professor Hailiang Huang for sharing  
647 the EAS SCZ GWAS summary statistics. We thank Dr. Elliot Gershon for helpful  
648 comments. Tissue was provided by the Human Brain Bank, Chinese Academy of  
649 Medical Sciences & Peking Union Medical College, Beijing, China, the Chinese Brain  
650 Bank Center, and the Xiangya School of Medicine Brain Bank. This study was  
651 supported by National Natural Science Foundation of China (Grants Nos. 31571312,  
652 31970572, 31871276, 91632116 and 81401114), the National Key R&D Project of  
653 China (Grants No. 2016YFC1306000 and 2017YFC0908701), Innovation-driven  
654 Project of Central South University (Grant Nos. 2020CX003, 2015CXS034 and  
655 2018CX033), Hunan Provincial Natural Science Foundation of China (Grant No.  
656 2019JJ40404), the Fundamental Research Funds for the Central Universities of  
657 Central South University, and NIH grants 1 U01 MH103340-01, 1R01ES024988.

## 658 **Author contributions**

659 S.L. drafted the manuscript, performed the genotype and RNA-seq quality control,  
660 mapped eQTL, performed functional enrichment, compared the brain regulatory  
661 architecture, as well as integrated QTLs with GWAS signals. Y.C. wrote the manuscript,  
662 constructed co-regulatory networks, performed preservation test as well as pathway  
663 enrichment analysis. F.W. wrote the manuscript, performed sQTL mapping and  
664 functional enrichment analysis. Y. J. preprocessing the genotype and RNA-seq data  
665 from PsychENCODE/BrainGVEX project. F.D. and M.L. extracted DNA and RNA, as  
666 well as collected sample information. Y.X., R.K, and L.K. substantively revised the  
667 manuscript. Z.N. and S.X. participated in the design of comparing the brain regulatory  
668 architecture. Sample provided by W.Q., C.M., X.Y., A.B., J.D., J.H. and B.T. C.L.  
669 provided PsychENCODE/BrainGVEX data. C.C. conceived, designed and supervised  
670 the study and modified the manuscript.

671 **Competing interests**

672 All the authors declare no competing financial interests.

673 **References**

- 674 1. Hindorff, L.A. *et al.* Prioritizing diversity in human genomics research. *Nat Rev Genet* **19**,  
675 175-185 (2018).
- 676 2. Buniello, A. *et al.* The NHGRI-EBI GWAS Catalog of published genome-wide association  
677 studies, targeted arrays and summary statistics 2019. *Nucleic Acids Res* **47**, D1005-D1012  
678 (2019).
- 679 3. Rosenberg, N.A. *et al.* Genome-wide association studies in diverse populations. *Nat Rev*  
680 *Genet* **11**, 356-66 (2010).
- 681 4. Peterson, R.E. *et al.* Genome-wide association studies in ancestrally diverse populations:  
682 Opportunities, methods, pitfalls, and recommendations. *Cell* (2019).
- 683 5. Martin, A.R. *et al.* Human Demographic History Impacts Genetic Risk Prediction across  
684 Diverse Populations. *Am J Hum Genet* **100**, 635-649 (2017).
- 685 6. Carlson, C.S. *et al.* Generalization and dilution of association results from European GWAS  
686 in populations of non-European ancestry: the PAGE study. *PLoS Biol* **11**, e1001661 (2013).
- 687 7. Nicolae, D.L. *et al.* Trait-associated SNPs are more likely to be eQTLs: annotation to  
688 enhance discovery from GWAS. *PLoS Genet* **6**, e1000888 (2010).
- 689 8. Li, Y.I. *et al.* RNA splicing is a primary link between genetic variation and disease. *Science*  
690 **352**, 600-4 (2016).
- 691 9. Zhu, Z. *et al.* Integration of summary data from GWAS and eQTL studies predicts complex  
692 trait gene targets. *Nat Genet* **48**, 481-7 (2016).
- 693 10. Hormozdiari, F. *et al.* Colocalization of GWAS and eQTL Signals Detects Target Genes. *Am*  
694 *J Hum Genet* **99**, 1245-1260 (2016).
- 695 11. Joehanes, R. *et al.* Integrated genome-wide analysis of expression quantitative trait loci  
696 aids interpretation of genomic association studies. *Genome Biol* **18**, 16 (2017).
- 697 12. Marigorta, U.M. *et al.* Transcriptional risk scores link GWAS to eQTLs and predict  
698 complications in Crohn's disease. *Nat Genet* **49**, 1517-1521 (2017).
- 699 13. Brown, A.A. *et al.* Predicting causal variants affecting expression by using whole-genome  
700 sequencing and RNA-seq from multiple human tissues. *Nat Genet* **49**, 1747-1751 (2017).
- 701 14. Hormozdiari, F. *et al.* Leveraging molecular quantitative trait loci to understand the  
702 genetic architecture of diseases and complex traits. *Nat Genet* **50**, 1041-1047 (2018).
- 703 15. Gamazon, E.R. *et al.* A gene-based association method for mapping traits using reference  
704 transcriptome data. *Nat Genet* **47**, 1091-8 (2015).
- 705 16. Gusev, A. *et al.* Integrative approaches for large-scale transcriptome-wide association  
706 studies. *Nat Genet* **48**, 245-52 (2016).
- 707 17. BrainSeq: Neurogenomics to Drive Novel Target Discovery for Neuropsychiatric Disorders.  
708 *Neuron* **88**, 1078-1083 (2015).
- 709 18. De Jager, P.L. *et al.* Alzheimer's disease: early alterations in brain DNA methylation at  
710 ANK1, BIN1, RHBDF2 and other loci. *Nat Neurosci* **17**, 1156-63 (2014).
- 711 19. Psych, E.C. *et al.* The PsychENCODE project. *Nat Neurosci* **18**, 1707-12 (2015).
- 712 20. Consortium, G.T. The Genotype-Tissue Expression (GTEx) project. *Nat Genet* **45**, 580-5  
713 (2013).
- 714 21. Mikhaylova, A.V. & Thornton, T.A. Accuracy of Gene Expression Prediction From Genotype  
715 Data With PrediXcan Varies Across and Within Continental Populations. *Front Genet* **10**,

- 716 261 (2019).
- 717 22. Mogil, L.S. *et al.* Genetic architecture of gene expression traits across diverse populations.  
718 *PLoS Genet* **14**, e1007586 (2018).
- 719 23. Gottlieb, A. *et al.* Cohort-specific imputation of gene expression improves prediction of  
720 warfarin dose for African Americans. *Genome Med* **9**, 98 (2017).
- 721 24. Stranger, B.E. *et al.* Patterns of cis regulatory variation in diverse human populations. *PLoS*  
722 *Genet* **8**, e1002639 (2012).
- 723 25. Mele, M. *et al.* Human genomics. The human transcriptome across tissues and individuals.  
724 *Science* **348**, 660-5 (2015).
- 725 26. Gamazon, E.R. *et al.* Using an atlas of gene regulation across 44 human tissues to inform  
726 complex disease- and trait-associated variation. *Nat Genet* **50**, 956-967 (2018).
- 727 27. Jiang, L. *et al.* DESE: estimating driver tissues by selective expression of genes associated  
728 with complex diseases or traits. *Genome Biol* **20**, 233 (2019).
- 729 28. Finucane, H.K. *et al.* Heritability enrichment of specifically expressed genes identifies  
730 disease-relevant tissues and cell types. *Nat Genet* **50**, 621-629 (2018).
- 731 29. Human genomics. The Genotype-Tissue Expression (GTEx) pilot analysis: multitissue gene  
732 regulation in humans. *Science* **348**, 648-60 (2015).
- 733 30. Xiang, R. *et al.* Genome variants associated with RNA splicing variations in bovine are  
734 extensively shared between tissues. *BMC Genomics* **19**, 521 (2018).
- 735 31. Collado-Torres, L. *et al.* Regional Heterogeneity in Gene Expression, Regulation, and  
736 Coherence in the Frontal Cortex and Hippocampus across Development and  
737 Schizophrenia. *Neuron* **103**, 203-216 e8 (2019).
- 738 32. Fromer, M. *et al.* Gene expression elucidates functional impact of polygenic risk for  
739 schizophrenia. *Nat Neurosci* **19**, 1442-1453 (2016).
- 740 33. Wang, D. *et al.* Comprehensive functional genomic resource and integrative model for  
741 the human brain. *Science* **362**(2018).
- 742 34. Delaneau, O. *et al.* A complete tool set for molecular QTL discovery and analysis. *Nat*  
743 *Commun* **8**, 15452 (2017).
- 744 35. Stegle, O., Parts, L., Piipari, M., Winn, J. & Durbin, R. Using probabilistic estimation of  
745 expression residuals (PEER) to obtain increased power and interpretability of gene  
746 expression analyses. *Nat Protoc* **7**, 500-7 (2012).
- 747 36. Li, Y.I. *et al.* Annotation-free quantification of RNA splicing using LeafCutter. *Nat Genet*  
748 **50**, 151-158 (2018).
- 749 37. Kim, Y. *et al.* A meta-analysis of gene expression quantitative trait loci in brain. *Transl*  
750 *Psychiatry* **4**, e459 (2014).
- 751 38. Walker, R.L. *et al.* Genetic Control of Expression and Splicing in Developing Human Brain  
752 Informs Disease Mechanisms. *Cell* **179**, 750-771 e22 (2019).
- 753 39. Schmidt, E.M. *et al.* GREGOR: evaluating global enrichment of trait-associated variants in  
754 epigenomic features using a systematic, data-driven approach. *Bioinformatics* **31**, 2601-  
755 6 (2015).
- 756 40. Consortium, G.T. *et al.* Genetic effects on gene expression across human tissues. *Nature*  
757 **550**, 204-213 (2017).
- 758 41. Willer, C.J., Li, Y. & Abecasis, G.R. METAL: fast and efficient meta-analysis of genomewide  
759 association scans. *Bioinformatics* **26**, 2190-1 (2010).
- 760 42. Langfelder, P. & Horvath, S. WGCNA: an R package for weighted correlation network  
761 analysis. *BMC Bioinformatics* **9**, 559 (2008).
- 762 43. Lam, M. *et al.* Comparative genetic architectures of schizophrenia in East Asian and  
763 European populations. *Nat Genet* **51**, 1670-1678 (2019).
- 764 44. Bipolar, D., Schizophrenia Working Group of the Psychiatric Genomics Consortium.  
765 Electronic address, d.r.v.e., Bipolar, D. & Schizophrenia Working Group of the Psychiatric  
766 Genomics, C. Genomic Dissection of Bipolar Disorder and Schizophrenia, Including 28

- 767 Subphenotypes. *Cell* **173**, 1705-1715 e16 (2018).
- 768 45. Finucane, H.K. *et al.* Partitioning heritability by functional annotation using genome-wide  
769 association summary statistics. *Nat Genet* **47**, 1228-35 (2015).
- 770 46. Nica, A.C. *et al.* Candidate causal regulatory effects by integration of expression QTLs with  
771 complex trait genetic associations. *PLoS Genet* **6**, e1000895 (2010).
- 772 47. Takata, A., Matsumoto, N. & Kato, T. Genome-wide identification of splicing QTLs in the  
773 human brain and their enrichment among schizophrenia-associated loci. *Nat Commun* **8**,  
774 14519 (2017).
- 775 48. Raj, T. *et al.* Integrative transcriptome analyses of the aging brain implicate altered splicing  
776 in Alzheimer's disease susceptibility. *Nat Genet* **50**, 1584-1592 (2018).
- 777 49. Narahara, M. *et al.* Large-scale East-Asian eQTL mapping reveals novel candidate genes  
778 for LD mapping and the genomic landscape of transcriptional effects of sequence variants.  
779 *PLoS One* **9**, e100924 (2014).
- 780 50. Wang, X. *et al.* Mapping of hepatic expression quantitative trait loci (eQTLs) in a Han  
781 Chinese population. *J Med Genet* **51**, 319-26 (2014).
- 782 51. Lappalainen, T. *et al.* Transcriptome and genome sequencing uncovers functional  
783 variation in humans. *Nature* **501**, 506-11 (2013).
- 784 52. Fraser, H.B., Lam, L.L., Neumann, S.M. & Kobor, M.S. Population-specificity of human DNA  
785 methylation. *Genome Biol* **13**, R8 (2012).
- 786 53. Tehranchi, A. *et al.* Fine-mapping cis-regulatory variants in diverse human populations.  
787 *Elife* **8**(2019).
- 788 54. Cann, H.M. *et al.* A human genome diversity cell line panel. *Science* **296**, 261-2 (2002).
- 789 55. International HapMap, C. *et al.* Integrating common and rare genetic variation in diverse  
790 human populations. *Nature* **467**, 52-8 (2010).
- 791 56. Genomes Project, C. *et al.* A global reference for human genetic variation. *Nature* **526**,  
792 68-74 (2015).
- 793 57. Novembre, J. & Di Rienzo, A. Spatial patterns of variation due to natural selection in  
794 humans. *Nat Rev Genet* **10**, 745-55 (2009).
- 795 58. Barreiro, L.B., Laval, G., Quach, H., Patin, E. & Quintana-Murci, L. Natural selection has  
796 driven population differentiation in modern humans. *Nat Genet* **40**, 340-5 (2008).
- 797 59. Torres, J.M. *et al.* Cross-tissue and tissue-specific eQTLs: partitioning the heritability of a  
798 complex trait. *Am J Hum Genet* **95**, 521-34 (2014).
- 799 60. Disease, G.B.D., Injury, I. & Prevalence, C. Global, regional, and national incidence,  
800 prevalence, and years lived with disability for 354 diseases and injuries for 195 countries  
801 and territories, 1990-2017: a systematic analysis for the Global Burden of Disease Study  
802 2017. *Lancet* **392**, 1789-1858 (2018).
- 803 61. Cai, L. *et al.* Implications of Newly Identified Brain eQTL Genes and Their Interactors in  
804 Schizophrenia. *Mol Ther Nucleic Acids* **12**, 433-442 (2018).
- 805 62. Romme, I.A., de Reus, M.A., Ophoff, R.A., Kahn, R.S. & van den Heuvel, M.P. Connectome  
806 Disconnectivity and Cortical Gene Expression in Patients With Schizophrenia. *Biol*  
807 *Psychiatry* **81**, 495-502 (2017).
- 808 63. Sekar, A. *et al.* Schizophrenia risk from complex variation of complement component 4.  
809 *Nature* **530**, 177-83 (2016).
- 810 64. Schadt, E.E. Molecular networks as sensors and drivers of common human diseases.  
811 *Nature* **461**, 218-23 (2009).
- 812 65. Liu, Y. & Chance, M.R. Pathway analyses and understanding disease associations. *Curr*  
813 *Genet Med Rep* **1**(2013).
- 814 66. Gandal, M.J. *et al.* Transcriptome-wide isoform-level dysregulation in ASD, schizophrenia,  
815 and bipolar disorder. *Science* **362**(2018).
- 816 67. Kushima, I. *et al.* High-resolution copy number variation analysis of schizophrenia in Japan.  
817 *Mol Psychiatry* **22**, 430-440 (2017).

- 818 68. Kushima, I. *et al.* Comparative Analyses of Copy-Number Variation in Autism Spectrum  
819 Disorder and Schizophrenia Reveal Etiological Overlap and Biological Insights. *Cell Rep*  
820 **24**, 2838-2856 (2018).
- 821 69. Berdenis van Berlekom, A. *et al.* Synapse Pathology in Schizophrenia: A Meta-analysis of  
822 Postsynaptic Elements in Postmortem Brain Studies. *Schizophr Bull* **46**, 374-386 (2020).
- 823 70. Hashimoto, R. *et al.* A missense polymorphism (H204R) of a Rho GTPase-activating  
824 protein, the chimerin 2 gene, is associated with schizophrenia in men. *Schizophr Res* **73**,  
825 383-5 (2005).
- 826 71. Rare chromosomal deletions and duplications increase risk of schizophrenia. *Nature* **455**,  
827 237-41 (2008).
- 828 72. Ng, M.Y. *et al.* Meta-analysis of 32 genome-wide linkage studies of schizophrenia. *Mol*  
829 *Psychiatry* **14**, 774-85 (2009).
- 830 73. Lewis, C.M. *et al.* Genome scan meta-analysis of schizophrenia and bipolar disorder, part  
831 II: Schizophrenia. *Am J Hum Genet* **73**, 34-48 (2003).
- 832 74. Allen, N.C. *et al.* Systematic meta-analyses and field synopsis of genetic association  
833 studies in schizophrenia: the SzGene database. *Nat Genet* **40**, 827-34 (2008).
- 834 75. Li, J. *et al.* Genes with de novo mutations are shared by four neuropsychiatric disorders  
835 discovered from NPdenovo database. *Mol Psychiatry* **21**, 298 (2016).
- 836 76. He, X. *et al.* Sherlock: detecting gene-disease associations by matching patterns of  
837 expression QTL and GWAS. *Am J Hum Genet* **92**, 667-80 (2013).
- 838 77. Gandal, M.J. *et al.* Shared molecular neuropathology across major psychiatric disorders  
839 parallels polygenic overlap. *Science* **359**, 693-697 (2018).
- 840 78. Yan, X.X., Ma, C., Bao, A.M., Wang, X.M. & Gai, W.P. Brain banking as a cornerstone of  
841 neuroscience in China. *Lancet Neurol* **14**, 136 (2015).
- 842 79. Qiu, W. *et al.* Standardized Operational Protocol for Human Brain Banking in China.  
843 *Neurosci Bull* **35**, 270-276 (2019).
- 844 80. Chen, Y. *et al.* SOAPnuke: a MapReduce acceleration-supported software for integrated  
845 quality control and preprocessing of high-throughput sequencing data. *Gigascience* **7**, 1-  
846 6 (2018).
- 847 81. Li, H. & Durbin, R. Fast and accurate short read alignment with Burrows-Wheeler  
848 transform. *Bioinformatics* **25**, 1754-60 (2009).
- 849 82. Li, H. *et al.* The Sequence Alignment/Map format and SAMtools. *Bioinformatics* **25**, 2078-  
850 9 (2009).
- 851 83. McKenna, A. *et al.* The Genome Analysis Toolkit: a MapReduce framework for analyzing  
852 next-generation DNA sequencing data. *Genome Res* **20**, 1297-303 (2010).
- 853 84. Das, S. *et al.* Next-generation genotype imputation service and methods. *Nat Genet* **48**,  
854 1284-1287 (2016).
- 855 85. Dobin, A. *et al.* STAR: ultrafast universal RNA-seq aligner. *Bioinformatics* **29**, 15-21 (2013).
- 856 86. Li, B. & Dewey, C.N. RSEM: accurate transcript quantification from RNA-Seq data with or  
857 without a reference genome. *BMC Bioinformatics* **12**, 323 (2011).
- 858 87. Ritchie, M.E. *et al.* limma powers differential expression analyses for RNA-sequencing and  
859 microarray studies. *Nucleic Acids Res* **43**, e47 (2015).
- 860 88. Roadmap Epigenomics, C. *et al.* Integrative analysis of 111 reference human epigenomes.  
861 *Nature* **518**, 317-30 (2015).
- 862 89. Arbiza, L. *et al.* Genome-wide inference of natural selection on human transcription factor  
863 binding sites. *Nat Genet* **45**, 723-9 (2013).
- 864 90. Zhu, Y. *et al.* POSTAR2: deciphering the post-transcriptional regulatory logics. *Nucleic*  
865 *Acids Res* **47**, D203-D211 (2019).
- 866 91. Danecek, P. *et al.* The variant call format and VCFtools. *Bioinformatics* **27**, 2156-8 (2011).
- 867 92. Balloux, F. & Lugon-Moulin, N. The estimation of population differentiation with  
868 microsatellite markers. *Mol Ecol* **11**, 155-65 (2002).

- 869 93. Zambon, A.C. *et al.* GO-Elite: a flexible solution for pathway and ontology over-  
870 representation. *Bioinformatics* **28**, 2209-10 (2012).  
871 94. Yu, G., Wang, L.G., Han, Y. & He, Q.Y. clusterProfiler: an R package for comparing  
872 biological themes among gene clusters. *OMICS* **16**, 284-7 (2012).

### 873 **Data availability**

874 The raw sequence data reported in this paper have been deposited in the Genome  
875 Sequence Archive in BIG Data Center, Beijing Institute of Genomics (BIG), Chinese  
876 Academy of Sciences, under accession numbers HRA000108, HRA000108 that can  
877 be accessed at <https://bigd.big.ac.cn/gsa-human>. eQTL and sQTL summary results  
878 for EAS samples can be downloaded from  
879 <http://brainexpnpd.org:8088/BrainEXPNDP/download.html>.

### 880 **Code availability**

881 Codes are available at <https://github.com/liusihan/population-compare-pipeline>

### 882 **Additional information**

883 Correspondence and requests for materials should be addressed to C.C.



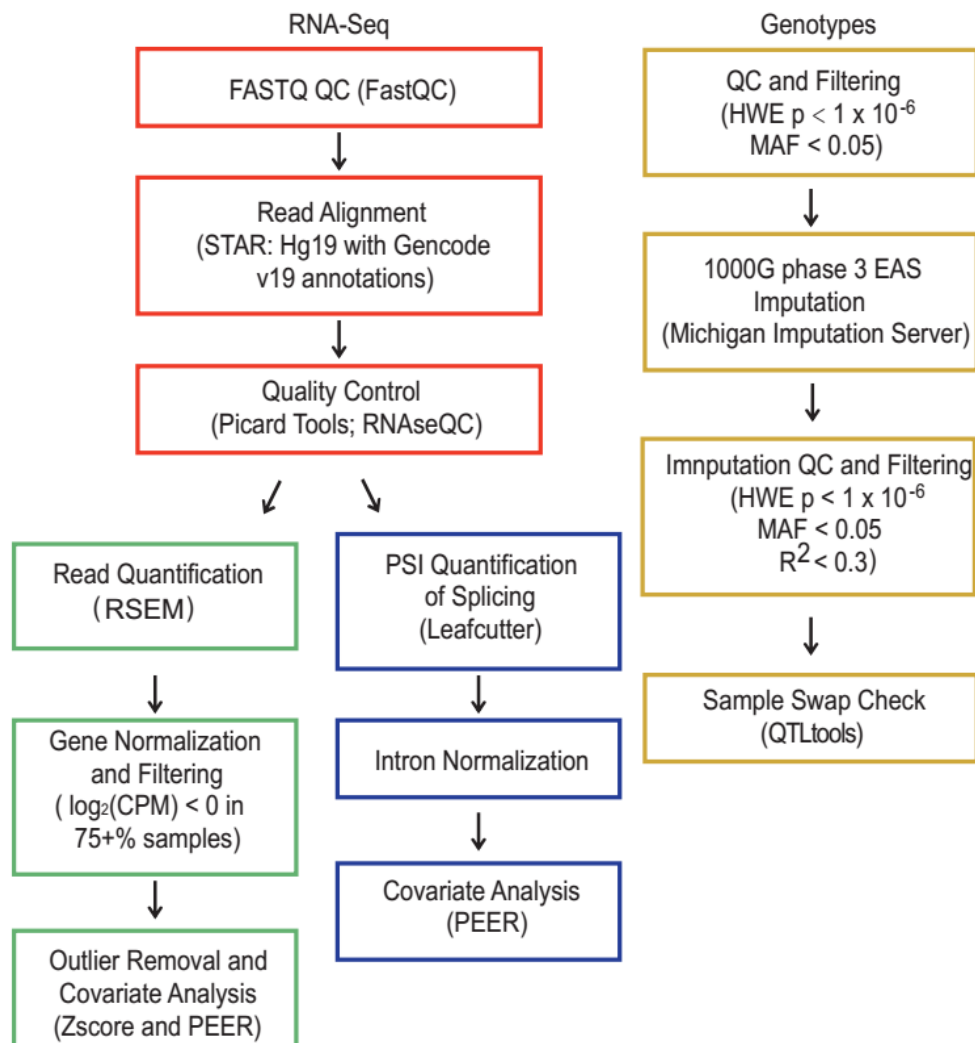

884

885 **Extended Data Fig.1 | Overview of methods and QC pipeline for EAS samples.**

a

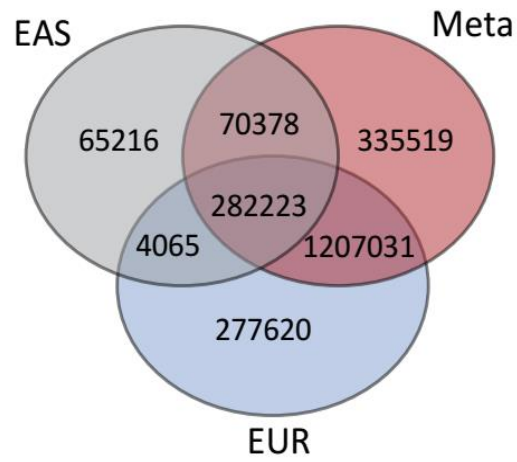

b

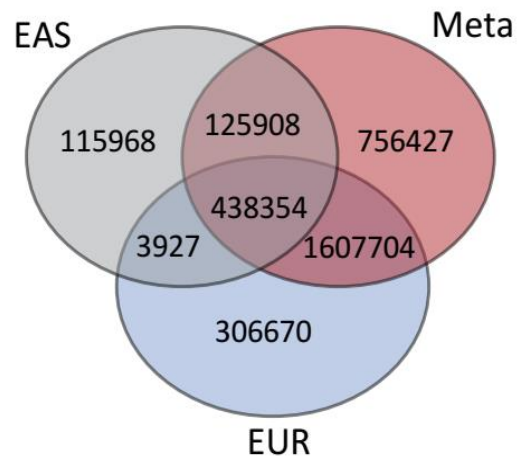

886

887 **Extended Data Fig.2 | QTL comparison. a, Venn plot for eQTLs. b, Venn plot for**

888 sQTLs.

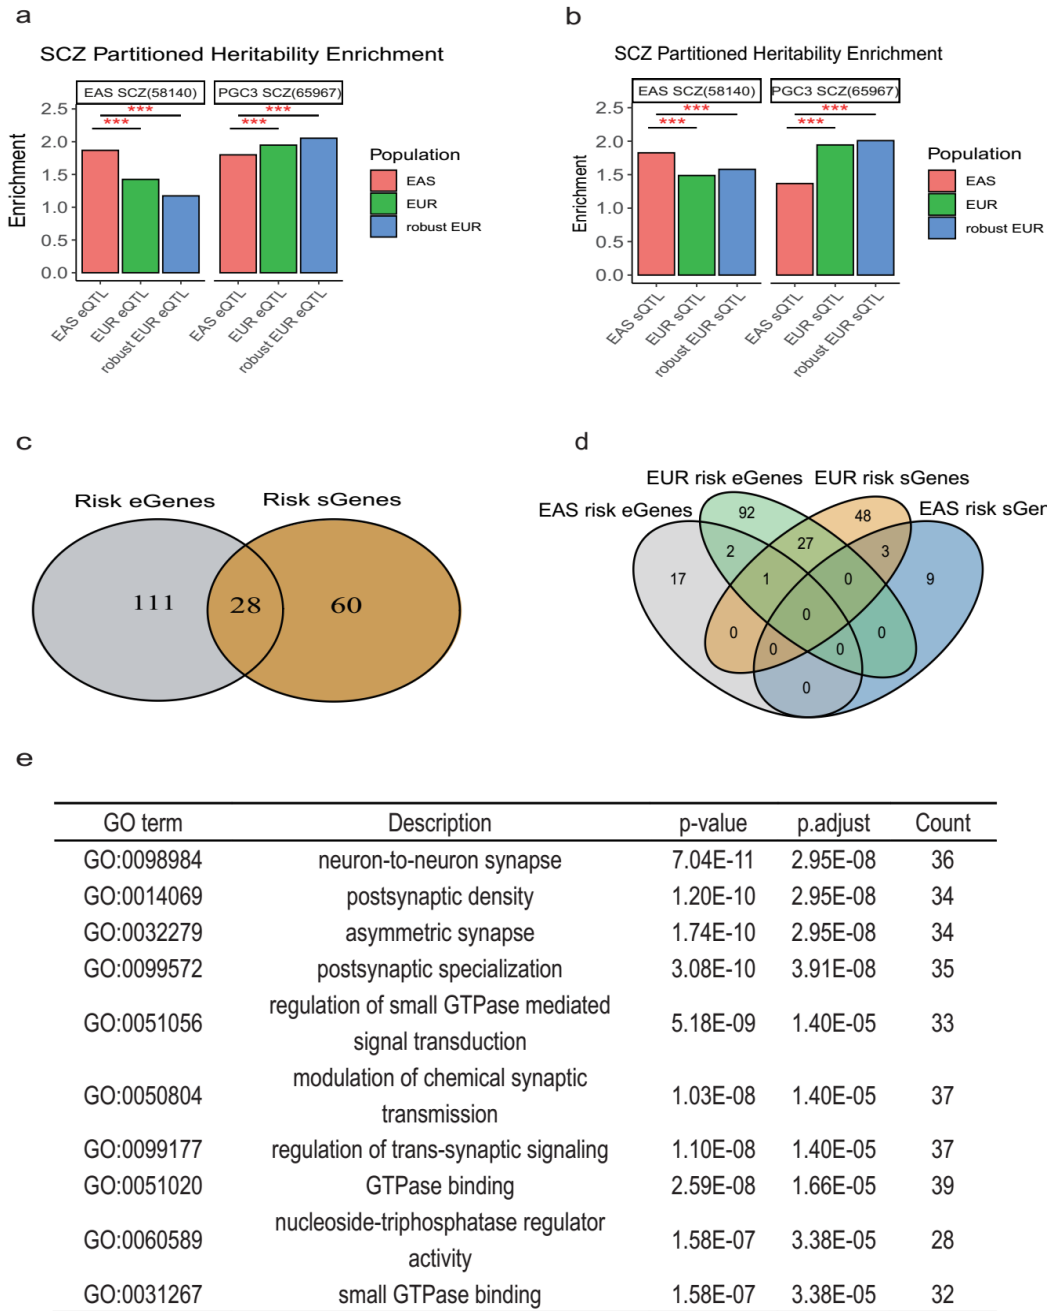

889

890 **Extended Data Fig.3 | Integrating SCZ GWAS signals. a**, GWAS signals enrichment

891 comparison for eQTLs. **b**, GWAS signals enrichment comparison for sQTLs. **c-d**, Venn

892 plot for risk genes identified by eQTLs and sQTLs. **e**, List of the top ten pathways which

893 enriched in SCZ risk genes. p.adjust: Bonferroni adjusted p-value. Count: number of

894 genes located in this pathway.
